# Supplementary material for: Nitrogen reduction through confined electro-catalysis with carbon nanotube inserted metal–organic frameworks
Source: Royal Society of Chemistry journal article supplement (doi:10.1039/d0ta11797h), 2020-12-17
Supplement: d0ta11797h1.pdf [file d0ta11797h1.pdf]

Electronic Supplementary Material (ESI) for Journal of Materials Chemistry A.  
This journal is © The Royal Society of Chemistry 2020

## Supporting Information

### **Nitrogen Reduction through Confined Electro-catalysis with Carbon Nanotube Inserted Metal Organic Frameworks**

Yang Lv<sup>a</sup>, Yiqi Wang<sup>a</sup>, Miao Yang<sup>a</sup>, Zhangyan Mu<sup>a</sup>, Shengtang Liu<sup>a</sup>, Weiping Ding<sup>a</sup>, Mengning Ding<sup>\*a</sup>

<sup>a</sup>Key Lab of Mesoscopic Chemistry, School of Chemistry and Chemical engineering, Nanjing University, Nanjing 210023, China. Email: mding@nju.edu.cn

#### **1. Supplementary experimental procedure**

##### **1.1. Chemical**

All reagents were commercially obtained without further treatment. Zirconium tetrachloride ( $ZrCl_4$ ), bismuth nitrate pentahydrate ( $Bi(NO_3)_3 \cdot 5H_2O$ ), Iron (III) nitrate nonahydrate ( $Fe(NO_3)_3 \cdot 9H_2O$ ), 1,4-benzenedicarboxylic acid ( $H_2BDC$ ), multi-walled carbon nanotubes (CNTs), N-doped multi-walled carbon nanotubes (NCNTs), sodium nitroferricyanide and p-dimethylaminobenzaldehyde were obtained from the Shanghai Macklin Biochemical Co., Ltd. Cerium (III) nitrate hexahydrate ( $Ce(NO_3)_3 \cdot 6H_2O$ ), salicylic acid, 1,3,5-benzenetricarboxylic acid ( $H_3BTC$ ), sodium hydroxide (NaOH) and sodium dihydrogen citrate were obtained from the Adamas Reagent Co., Ltd. Ethanol (EtOH), methanol (MeOH), acetone, sulfuric acid ( $H_2SO_4$ ), hydrochloric acid (HCl), Hydrazine dihydrochloride and ( $N_2H_4 \cdot 2HCl$ ), N,N-dimethylformamide (DMF) were obtained from the Sinopharm Chemical Reagent Co., Ltd. Sodium hypochlorite (NaClO, 11-14% available chlorine) and 5 wt% Nafion solution were obtained from the Alfa Aesar. 1,3,5-tris(4-carboxyphenyl)benzene (BTB) was obtained from the Boka-chem Co., Ltd. DI water ( $18.2 M\Omega \cdot cm$  at  $25^\circ C$ ,  $TOC < 5 ppb$ ) used in this study was

obtained from Milli-Q Integral 3 System (Merck Millipore).

### **1.2. Synthesis of UIO-66 system**

The UIO-66 was prepared following a previously reported method (UIO-66).<sup>1</sup> In detail, the UIO-66 precursor was prepared by dissolving  $ZrCl_4$  (0.536 g) and  $H_2BDC$  (0.5 g) in 60 mL DMF at room temperature. The obtained mixture was sealed in a Teflon-reactor and held at 120 °C for 24 h. After cooling to room temperature, the resulted white solid was collected by centrifugation, washed with DMF and MeOH each for 3 times, and was dried under 70 °C overnight. The final product was identified by XRD as UIO-66. In addition, CNT@UIO-66 and NCNT@UIO-66 were synthesized following the same procedure, in the presence of CNT (20 mg) and NCNT (20 mg).

### **1.3. Synthesis of BIT-58 system**

The BIT-58 was prepared following a previously reported method (BIT-58).<sup>2</sup> In detail, the BIT-58 precursor was prepared by dissolving  $Ce(NO_3)_3 \cdot 6H_2O$  (0.5544 g) and BTB (0.192 g) in 65 mL DMF/MeOH/ $H_2O$  (6 : 6 : 1) mixed solution with ultrasound for about 30 min at room temperature. The obtained mixture was sealed in a Teflon-reactor and held at 85 °C for 24 h. After cooling to room temperature, the resulted light yellow bulk crystals were collected by centrifugation, washed with DMF and MeOH each for 3 times, and were dried under 70 °C overnight. The final product was identified by XRD as BIT-58. In addition, CNT@BIT-58 and NCNT@BIT-58 were synthesized following the same procedure, in the presence of CNT (20 mg) and NCNT (20 mg).

### **1.4. Synthesis of CAU-17 system**

The CAU-17 was prepared following a previously reported method (CAU-17).<sup>3</sup> In detail, the CAU-17 precursor was prepared by dissolving ground  $Bi(NO_3)_3 \cdot 5H_2O$  (0.15 g) and  $H_3BTC$  (0.75 g) in 60 mL MeOH at room temperature. The obtained mixture was sealed in a Teflon-reactor and held at 120 °C for 24 h. After cooling to room temperature, the resulted white powder was collected by centrifugation, washed with MeOH for 5 times and acetone for one

time, and was dried under 70 °C overnight. The final product was identified by XRD as CAU-17. In addition, CNT@CAU-17 and NCNT@CAU-17 were synthesized following the same procedure, in the presence of CNT (20 mg) and NCNT (20 mg).

### **1.5. Synthesis of MIL-101(Fe) system**

The MIL-101(Fe) was prepared following a previously reported method (MIL-101(Fe)).<sup>4</sup> In detail, the MIL-101(Fe) precursor was prepared by dissolving Fe(NO<sub>3</sub>)<sub>3</sub>·9H<sub>2</sub>O (2.4 g) and H<sub>2</sub>BDC (0.984 g) in 60 mL DMF at room temperature. The obtained mixture was sealed in a Teflon-reactor and held at 150 °C for 16 h. After cooling to room temperature, the resulted brownish red products were collected by centrifugation, washed with DMF and MeOH each for 3 times, and was dried under 90 °C overnight. The final product was identified by XRD as MIL-101(Fe). In addition, CNT@MIL-101(Fe) and NCNT@MIL-101(Fe) were synthesized following the same procedure, in the presence of CNT (20 mg) and NCNT (20 mg).

### **1.6. Preparation of the catalytic working electrodes**

5 mg of the as-prepared catalyst was dispersed in mixed solution of deionized water (240 μL) and EtOH (720 μL), to give a homogeneous suspension after sonication for 30 min. Subsequently, 40 μL Nafion (5wt% in EtOH) was added and the suspension was sonicated for another 30 min. Then, 50 μL catalyst ink was dropped on a carbon paper electrode with an area of 1 cm<sup>2</sup> and dried at room temperature for 2 h. The mass loading of catalyst was *ca.* 0.25 mg cm<sup>-2</sup>.

### **1.7. Electrochemical nitrogen reduction reaction (eNRR) measurements**

Electrochemical measurements were carried out with an H-type cell (15 mL in volume) separated by a Nafion 211 membrane at room temperature and atmospheric pressure, with a potentiostat CHI 750E. In the NRR stability test, each catalyst was tested for six times. Before NRR tests, the membrane was pretreated in refer to the literature<sup>1</sup>. In specific, the membrane was protonated by first boiling in ultrapure water for 1 h and treating in H<sub>2</sub>O<sub>2</sub> (5%) aqueous

solution at 80 °C for another 1 h, respectively. And then, the membrane was treated in 0.5 M H<sub>2</sub>SO<sub>4</sub> for 3 h at 80 °C and finally in water for 6 h. Graphite rod and Ag/AgCl electrode were used as counter electrode and reference electrode, respectively. The electrolyte was 0.05 M H<sub>2</sub>SO<sub>4</sub> and the total volume was 15 mL. The electrolyte was pre-saturated with N<sub>2</sub> or Ar gas bubbling for 1 h prior to each electrochemical measurement and continuously bubbled with corresponding gas at a flow rate of 15 sccm during the tests. The scan rate of the linear sweep voltammetry was set at a rate of 1 mV s<sup>-1</sup> and the current densities were normalized by geometric surface areas. The NRR activity of a sample was evaluated using potentiostatic method for 2 h at room temperature. Readings for the Ag/AgCl electrode were converted to the reversible hydrogen electrode (RHE) according to the following relationship.

$$E(RHE) = E(Ag/AgCl) + 0.197V + 0.0592 \times pH$$

### 1.8. Ammonia quantification by indophenol blue method<sup>5</sup>

The concentration-absorbance curves were calibrated using standard NH<sub>3</sub> solution with varying concentrations (Fig. S8). The fitting curve ( $y = 0.37467x + 0.03152$ ,  $R^2 = 0.999$ ) shows good linear relation of absorbance value with NH<sub>3</sub> concentration. In detail, NH<sub>4</sub><sup>+</sup> standard solutions with specific concentrations were formed by dissolving a specific amount of (NH<sub>4</sub>)<sub>2</sub>SO<sub>4</sub> in 0.05 M H<sub>2</sub>SO<sub>4</sub> aqueous solution to give 0~2.0 μg mL<sup>-1</sup> concentration of NH<sub>4</sub><sup>+</sup>. Then, salicylic acid developer, sodium hypochlorite, and nitropurina were subsequently added into the standard solutions (with a ratio of 2 mL : 1 mL : 0.2 mL : 2 mL). After standing at room temperature for 2 hr, the UV-Vis absorption spectrum was measured at a wavelength of 655 nm to give a standard calibration curve. The quantity of the produced NH<sub>3</sub> from eNRR was determined as following: for the indophenol blue method, 2 mL of the post-electrolysis electrolyte was pipetted and mixed with 2 mL of NaOH solution (1 M) containing 5 wt% salicylic acid and 5 wt% sodium citrate. Then, 1 mL NaClO solution (0.05 M) and 200 μL sodium nitroferricyanide solution (1 wt%) were added into the mixture sequentially. After 2

hr, the mixed solution was tested by UV-vis spectrophotometer (UV-2600, Shimadzu) to obtain the absorption spectra, the peak value of which was then used with above calibration curve for the quantification of  $\text{NH}_3$  production. The peak of the resulting indophenol blue was at *ca.*  $\lambda = 655$  nm.

### 1.9. Hydrazine quantification by spectrophotometric method<sup>6</sup>

Absolute calibration of hydrazine was achieved using  $\text{N}_2\text{H}_4$  solutions of known concentration as standards, and the fitting curve shows good linear relation of absorbance with  $\text{N}_2\text{H}_4$  concentration in 0.05 M  $\text{H}_2\text{SO}_4$  (Fig. S9,  $y = 1.2004x + 0.052$ ,  $R^2 = 0.999$ ). In detail, first, preparing a series of standard solutions ( $0\sim 2.5 \mu\text{g mL}^{-1}$ ); second, adding 5 mL prepared color reagent and staining for 2 h at room temperature; finally, the absorbance of the resulting solution was measured at 455 nm, and the yields of  $\text{N}_2\text{H}_4$  were estimated from a standard curve using 5 mL residual electrolyte and 5 mL color reagent. The quantification of the hydrazine was determined by the spectrophotometric method. Briefly, 5 mL electrolyte was added into 5 mL coloring solution which contained 4 g p-dimethylaminobenzaldehyde, 20 mL concentrated hydrochloric acid and 200 mL ethanol. After 15 min, the absorbance at *ca.*  $\lambda = 455$  nm of the resulting solution was collected by using UV-vis spectrophotometer (Shimadzu UV-2600).

### 1.10. Calculation of the $\text{NH}_3$ yield rate and faradaic efficiency

The  $\text{NH}_3$  yield rate was calculated as follows:

$$\text{NH}_3 \text{ yield rate} = \frac{C_{\text{NH}_3} \times V}{t \times m_{\text{cat}}}$$

The faradaic efficiency was estimated from the charge consumed for  $\text{NH}_3$  production and the total transfer during NRR test:

$$\text{Faradaic Efficiency} = \frac{3 \times C_{\text{NH}_3} \times V \times F}{17Q}$$

where  $C_{\text{NH}_3}$  is the concentration of the measured ammonia,  $V$  is the volume of the electrolyte,  $t$  is the reduction time,  $\text{mg}_{\text{cat}}$  is the amount of the catalyst on the electrode,  $F$  is the Faraday constant (96485 C mol<sup>-1</sup>) and  $Q$  is the total transferred charge during NRR test.

### 1.11. Isotope-labelled experiments

The electrolyte was firstly bubbled with Ar for 1 h, and then electrolyzed with <sup>15</sup>N<sub>2</sub> (99 at%) at -0.45 V vs. RHE in 0.05 M H<sub>2</sub>SO<sub>4</sub>, the obtained <sup>15</sup>NH<sub>4</sub><sup>+</sup> was qualitatively determined by <sup>1</sup>H nuclear magnetic resonance. In detail, 15 mL of the electrolyte was taken out and concentrated to 1 mL by heating at 80 °C. Afterwards, 0.9 mL of the above electrolyte was taken out and mixed with 0.1 mL DMSO-*d*<sub>6</sub> as an internal standard for <sup>1</sup>H NMR measurement.

## 2. Supplementary figures and tables

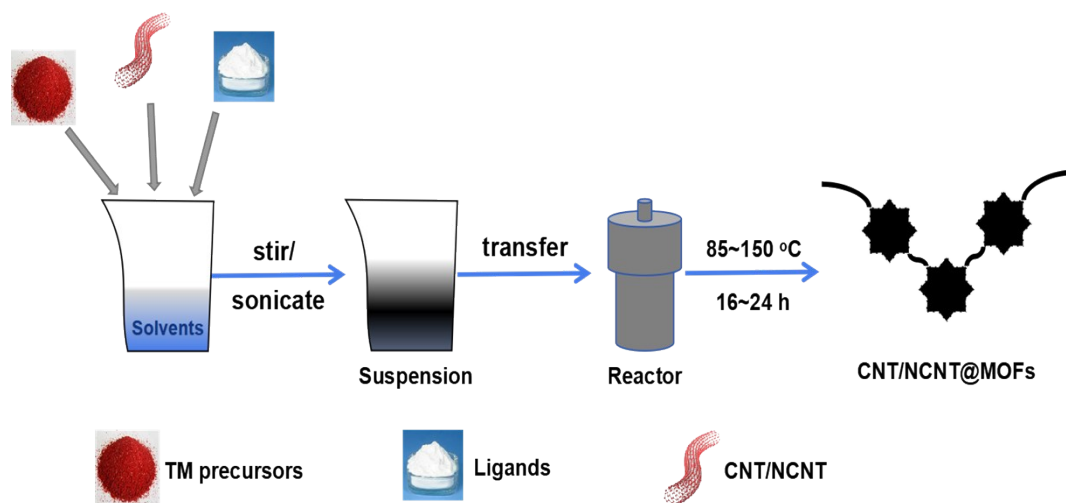

**Fig. S1.** Scheme of the synthesis of CNT/NCNT@MOFs.

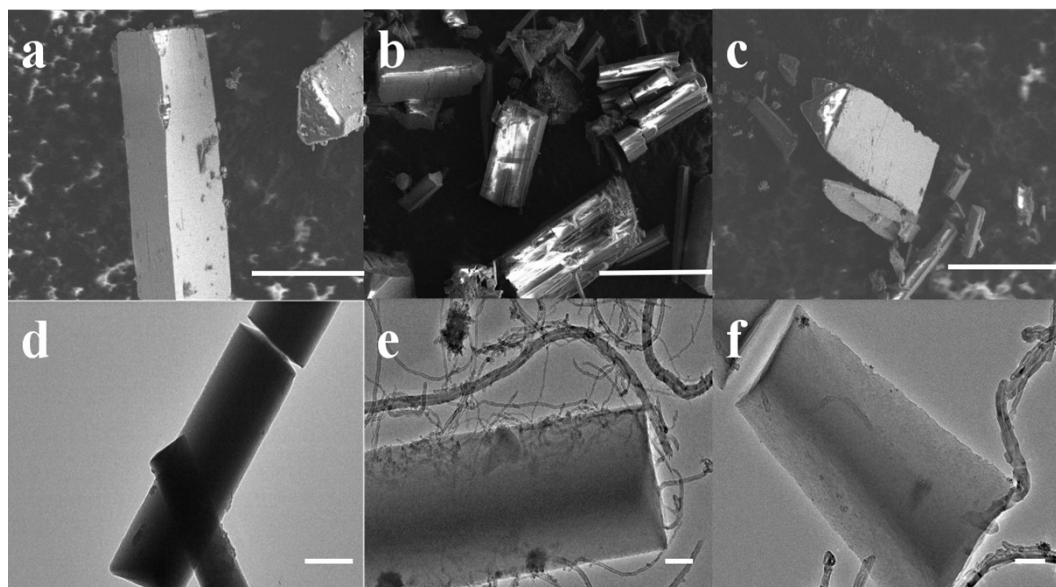

**Fig. S2.** SEM images of (a) BIT-58, (b) CNT@BIT-58, and (c) NCNT@BIT-58. TEM images of (d) BIT-58, (e) CNT@BIT-58, and (f) NCNT@BIT-58. Scale bars are 20  $\mu\text{m}$  in (a), (b) and (c), 500 nm in (d), 200 nm in (e), and 100 nm in (f).

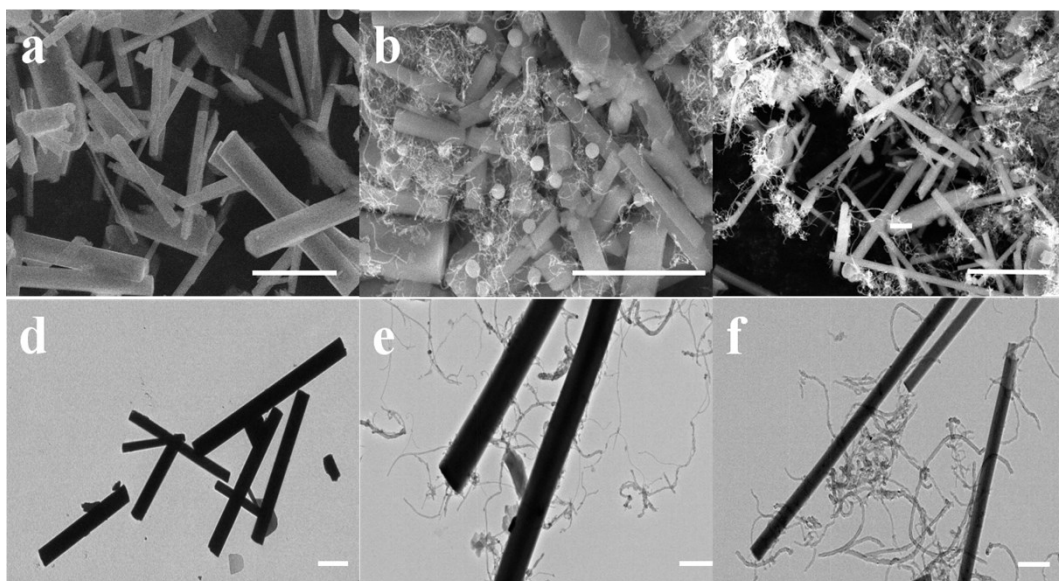

**Fig. S3.** SEM images of (a) CAU-17, (b) CNT@CAU-17, (c) NCNT@CAU-17. TEM images of (e) CAU-17, (f) CNT@CAU-17, (g) NCNT@CAU-17. Scale bars are 5  $\mu\text{m}$  in (a), 4  $\mu\text{m}$  in (b), 5  $\mu\text{m}$  in (c), 2  $\mu\text{m}$  in (d), 500 nm in (e) and (f).

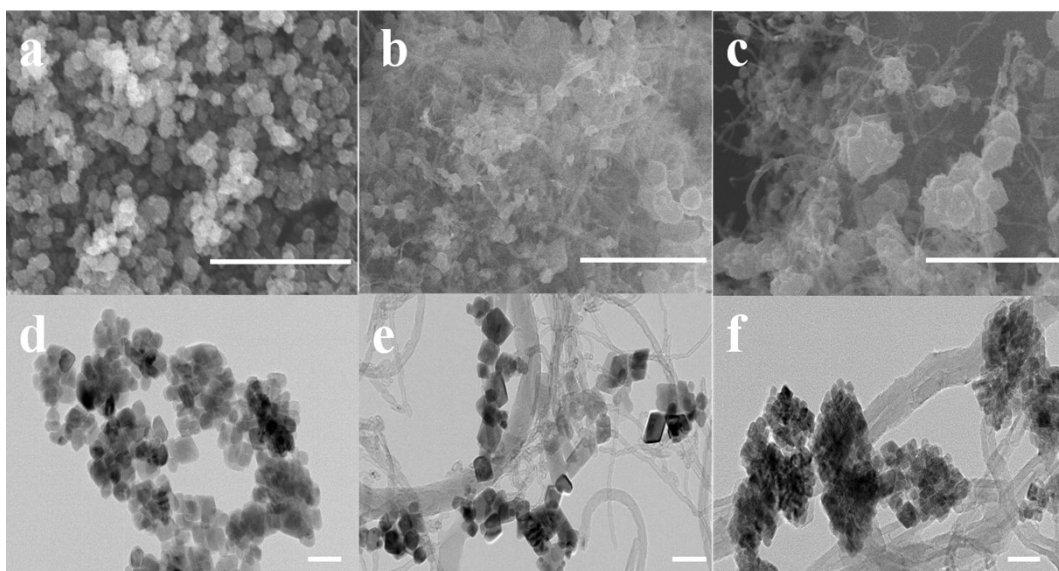

**Fig. S4.** SEM images of (a) MIL-101(Fe), (b) CNT@MIL-101(Fe), (c) NCNT@MIL-101(Fe). TEM images of (d) MIL-101(Fe), (e) CNT@MIL-101(Fe), (f) NCNT@MIL-101(Fe). Scale bars are 1  $\mu\text{m}$  in (a), (b) and (c), 50 nm in (d), 100 nm in (e), and 50 nm in (f).



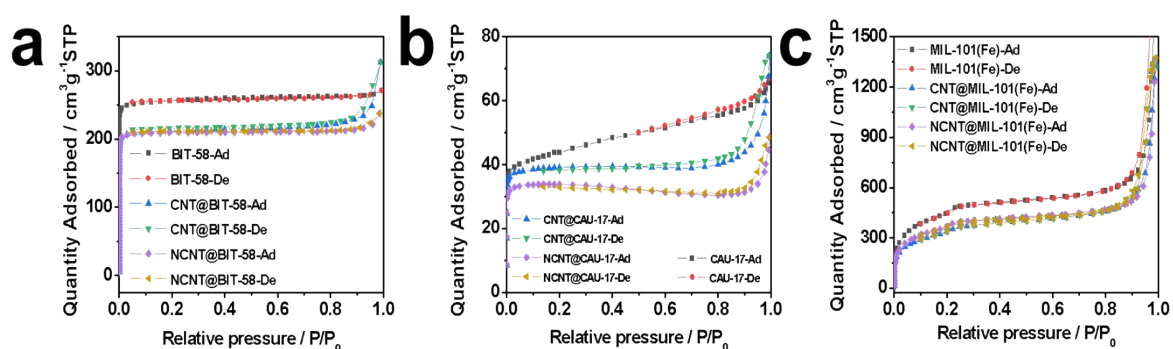

**Fig. S5.**  $N_2$  adsorption-desorption isotherms of (a) BIT-58 system, (b) CAU-17 system and (c) MIL-101(Fe) system.

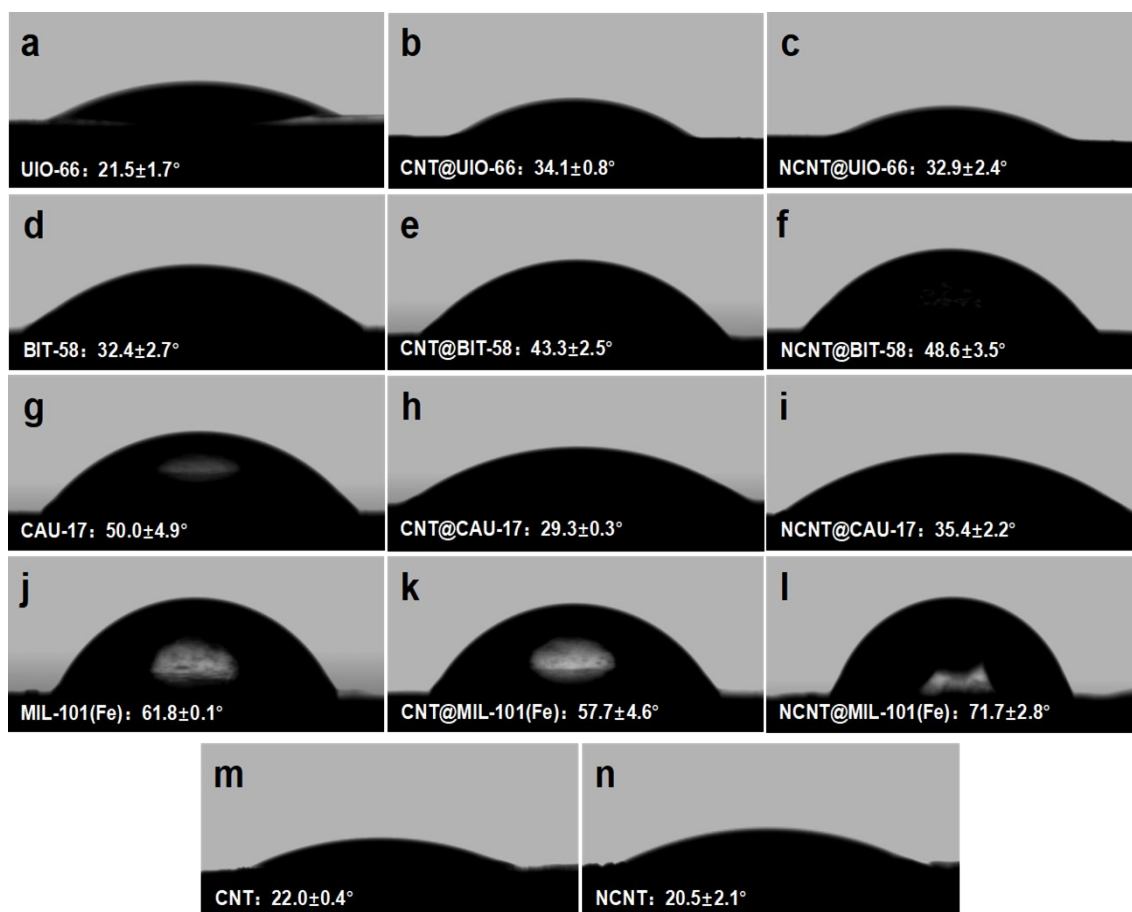

**Fig. S6.** Water contact angles image of (a-c) UIO-66 system, (d-f) BIT-58 system, (g-i) CAU-17 system, (j-l) MIL-101(Fe) system and (m-n) CNT/NCNT.

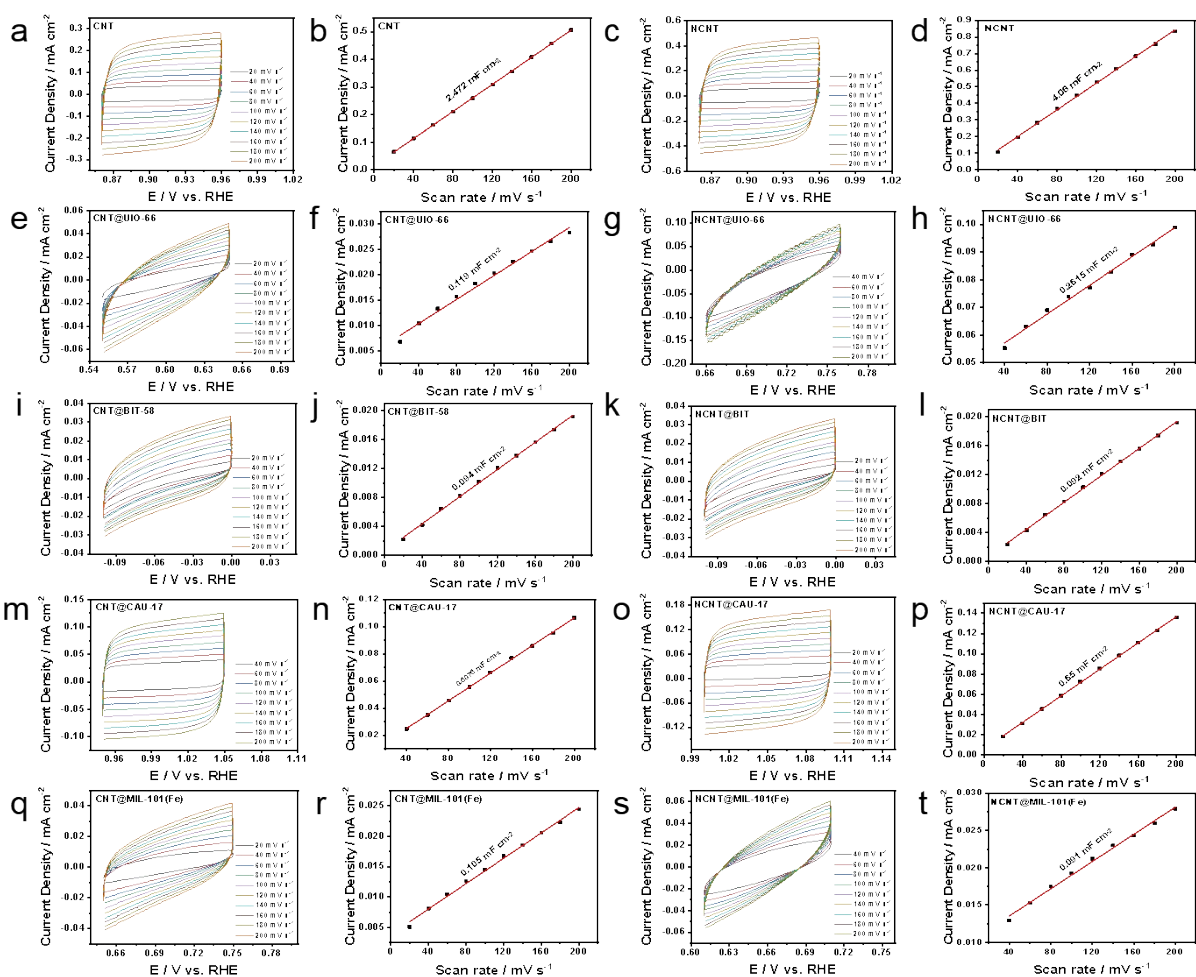

**Fig. S7.** CV curves of CNT/NCNT (a)/(c), CNT/NCNT@UIO-66 (e)/(g), CNT/NCNT@BIT-58 (i)/(k), CNT/NCNT@CAU-17 (m)/(o) and CNT/NCNT@MIL-101(Fe) (q)/(s). Capacitive current densities derived from CV curves against scan rates for CNT/NCNT (b)/(d), CNT/NCNT@UIO-66 (f)/(h), CNT/NCNT@BIT-58 (j)/(l), CNT/NCNT@CAU-17 (n)/(p) and CNT/NCNT@MIL-101(Fe) (r)/(t).

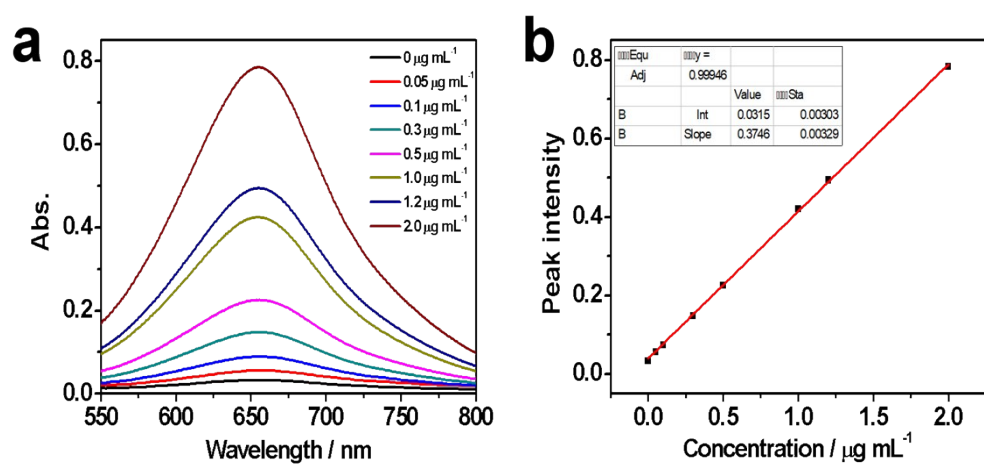

**Fig. S8.** (a) UV-Vis absorption spectra of indophenol blue solutions. (b) Calibration curve used for the estimation of  $\text{NH}_4^+$  concentration. The 0.05 M  $\text{H}_2\text{SO}_4$  was used as the baseline in the calibration curve.

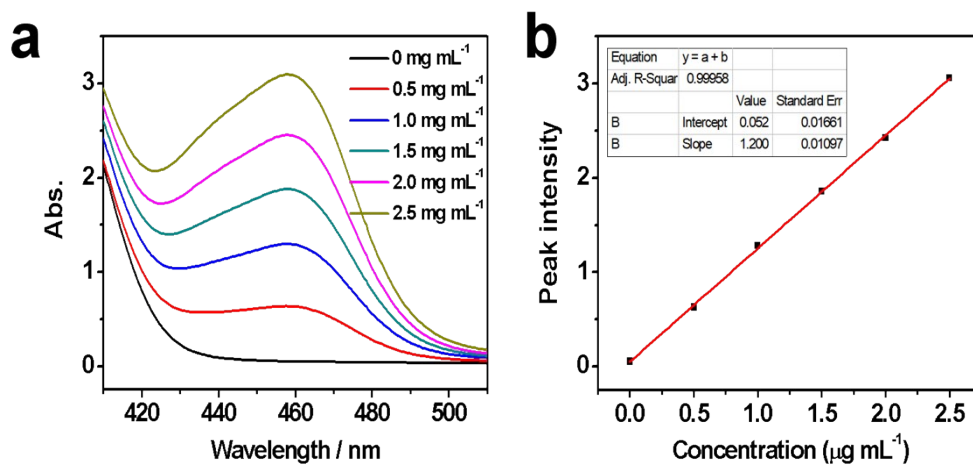

**Fig. S9.** (a) UV-vis absorption spectra and (b) corresponding standard calibration curve of the electrolytes of hydrazine.

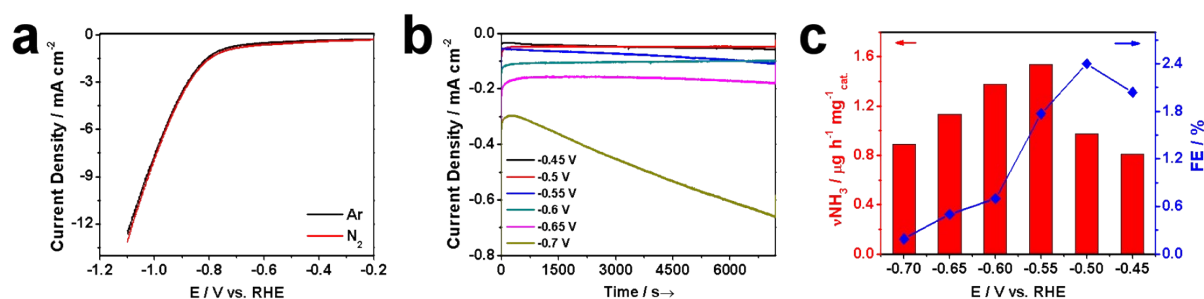

**Fig. S10.** (a) LSV curves of CNT under Ar and  $\text{N}_2$ . (b) Chronoamperometry tests for CNT at selected potentials. (c) UV-Vis absorption spectra of CNT at each potential. (d)  $\text{NH}_3$  yield rates and corresponding FEs of CNT at selected potentials.

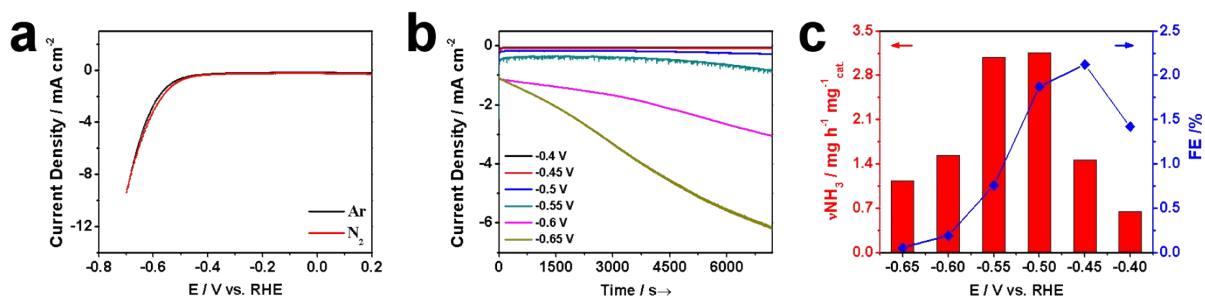

**Fig. S11.** (a) LSV curves of NCNT under Ar and N<sub>2</sub>. (b) Chronoamperometry tests for NCNT at selected potentials. (c) UV-Vis absorption spectra of NCNT at each potential. (d) NH<sub>3</sub> yield rates and corresponding FEs of NCNT at selected potentials.

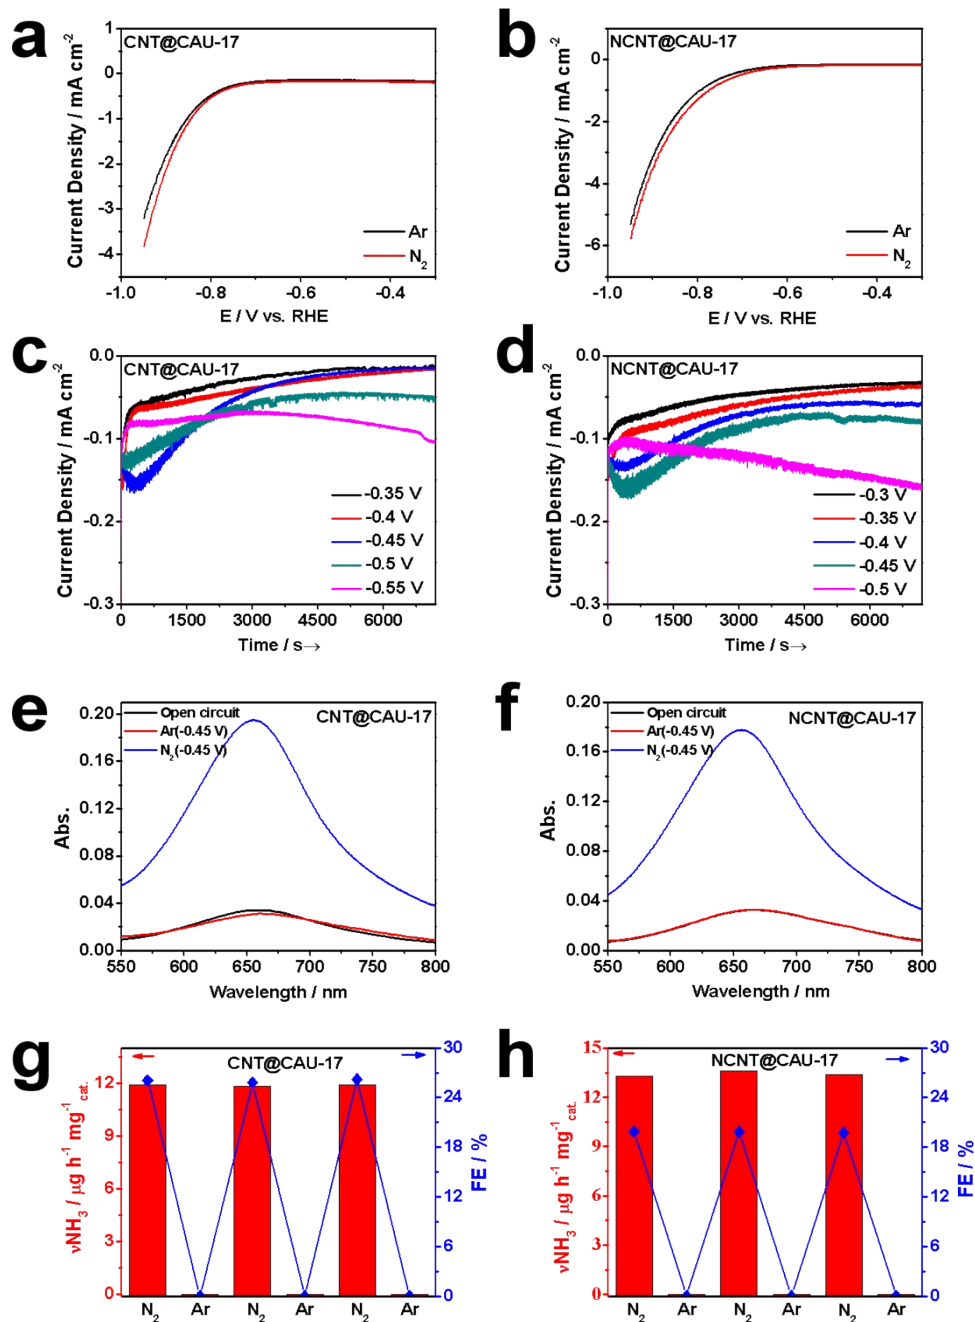

**Fig. S12.** (a), (b) Polarization curves of CNT/NCNT@CAU-17 under Ar and N<sub>2</sub>. (c), (d) Potentialstatic curves of CNT/NCNT@CAU-17. (e), (f) UV-Vis absorption spectra of Ar-saturated post electrolytes under -0.45 V (red), N<sub>2</sub>-saturated post electrolytes under open circuit potential (black) and N<sub>2</sub>-saturated post electrolyte under -0.45 V (blue) of CNT/NCNT@CAU-17. (g), (h) NH<sub>3</sub> yield rates and corresponding FEs of CNT/NCNT@CAU-17 at -0.45 V with alternating 2 h cycles between N<sub>2</sub>-saturated and Ar-saturated electrolytes, for a total of 12 h.

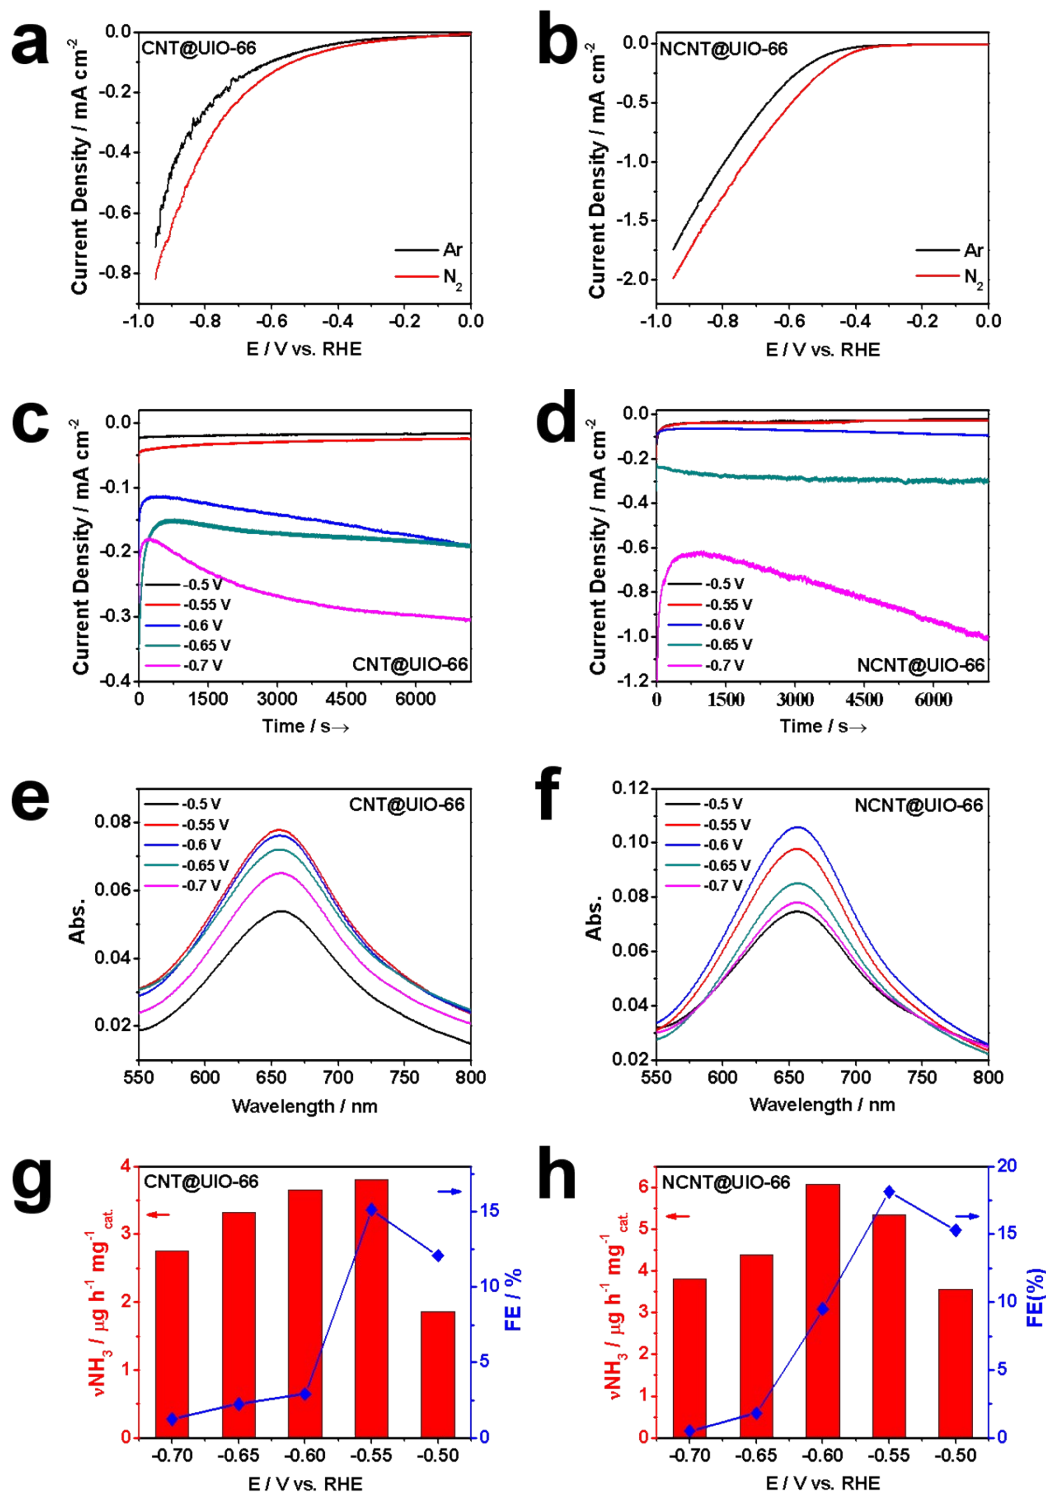

**Fig. S13.** (a), (b) Polarization curves of CNT/NCNT@UIO-66 under Ar and N<sub>2</sub>. (c), (d) Potentialstatic curves of CNT/NCNT@UIO-66. (e), (f) UV-Vis absorption spectra of the electrolyte stained with indophenol blue indicator after electrolysis at selected potentials of CNT/NCNT@UIO-66. (g), (h) NH<sub>3</sub> yield rates and corresponding FEs of CNT/NCNT@UIO-66 at selected potentials.

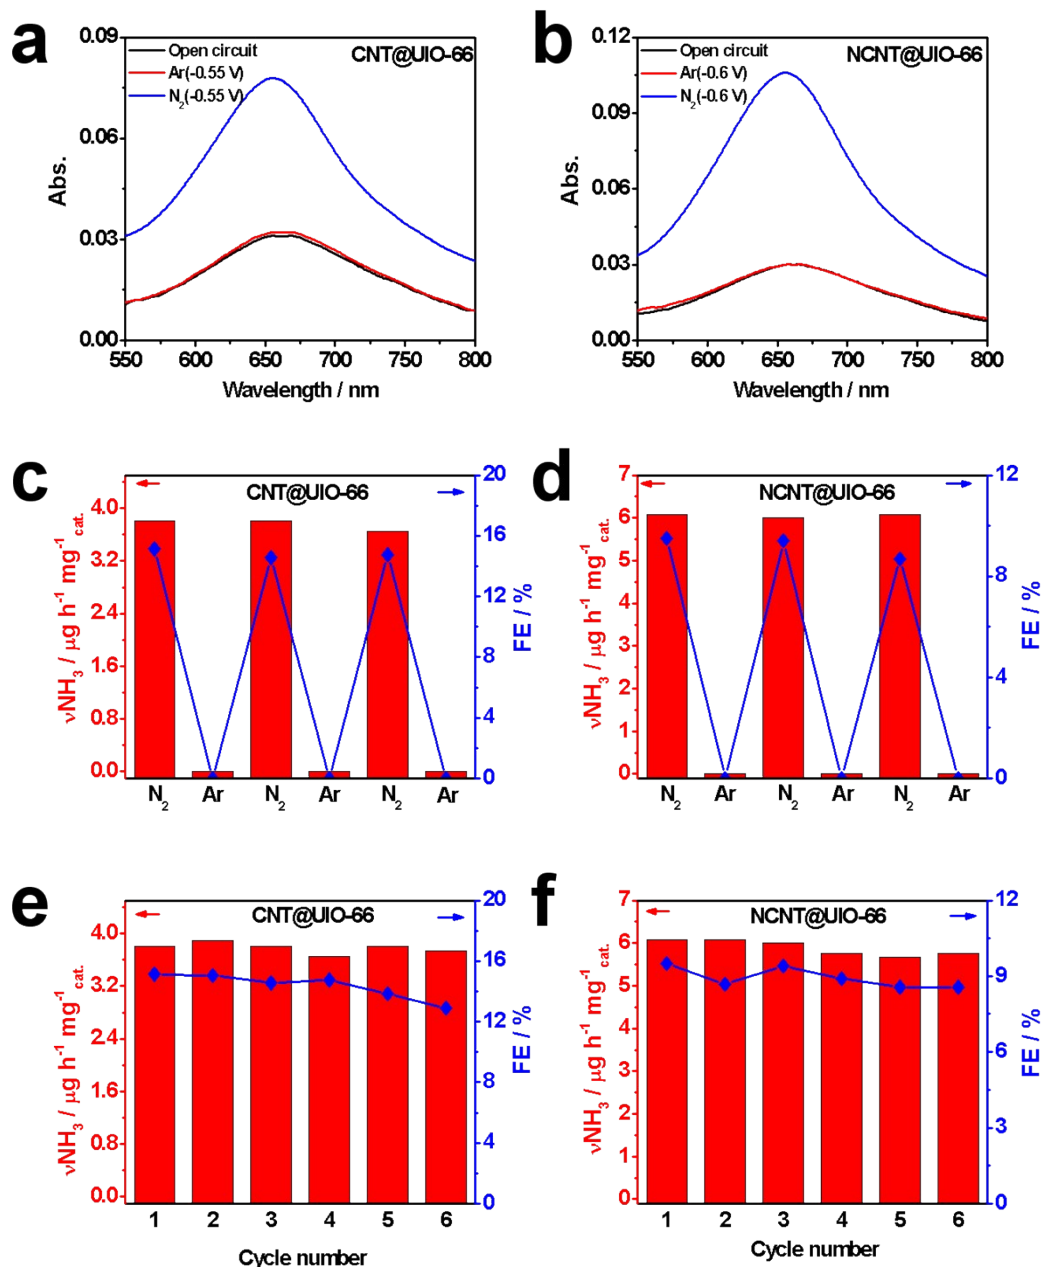

**Fig. S14.** (a), (b) UV-Vis absorption spectra of Ar-saturated post electrolytes under -0.55 V (red), N<sub>2</sub>-saturated post electrolytes under open circuit potential (black) and N<sub>2</sub>-saturated post electrolytes under -0.55 V (blue) of CNT/NCNT@UIO-66. (c), (d) NH<sub>3</sub> yield rates and corresponding FEs of CNT/NCNT@UIO-66 at -0.55 V with alternating 2 h cycles between N<sub>2</sub>-saturated and Ar-saturated electrolytes, for a total of 12 h. (e), (f) NH<sub>3</sub> yield rates and corresponding FEs of CNT/NCNT@UIO-66 after each cycle at -0.55 V vs. RHE.

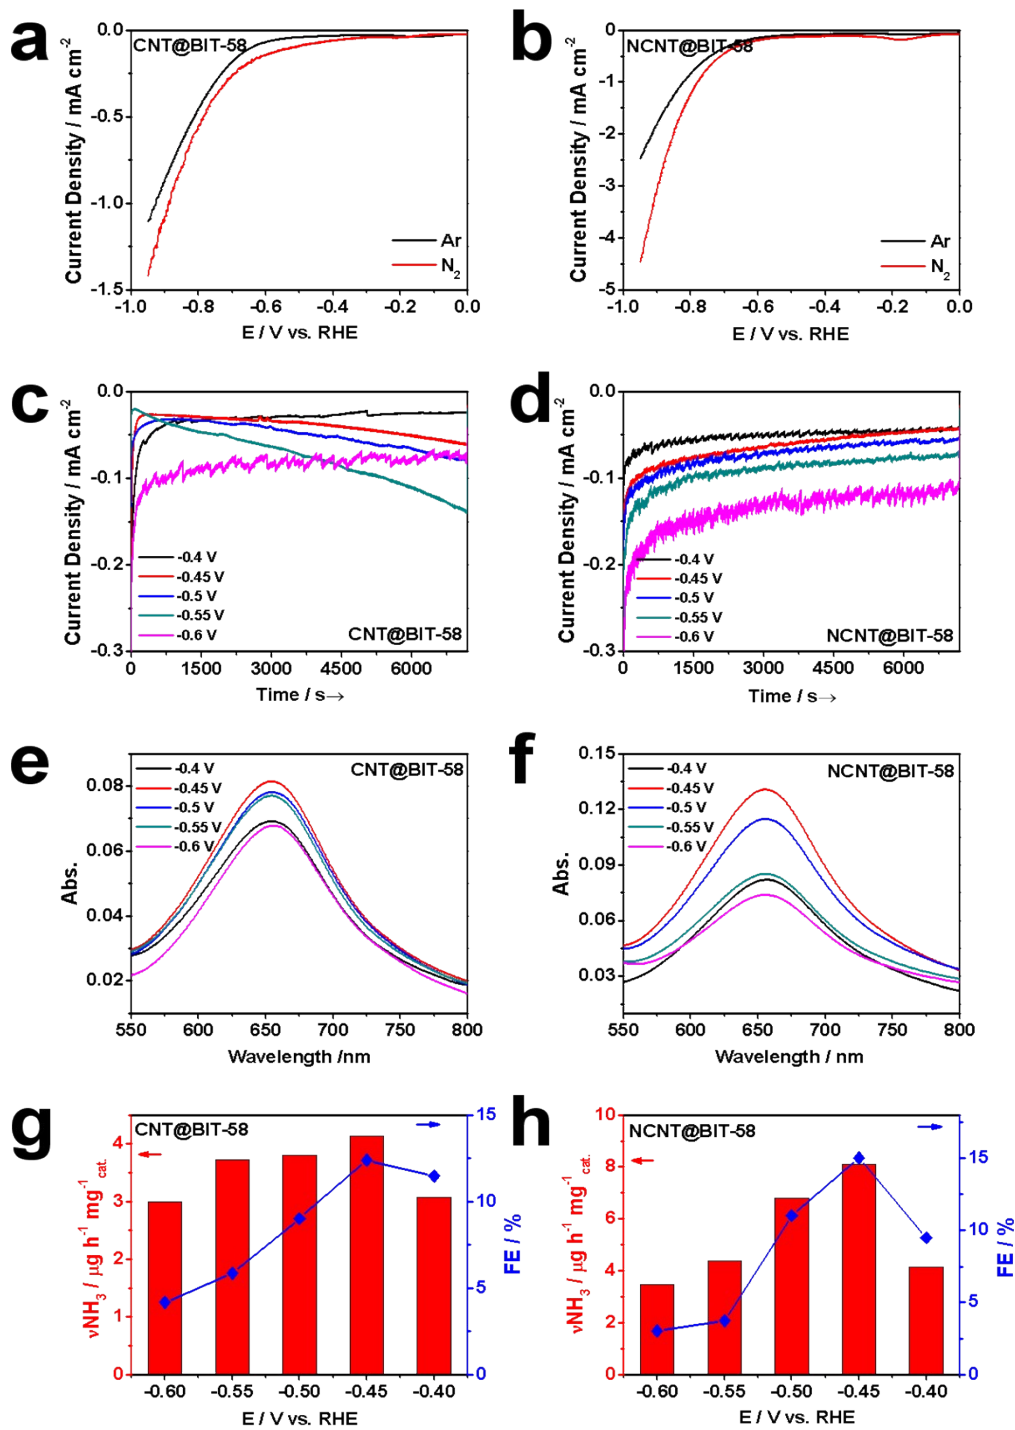

**Fig. S15.** (a), (b) Polarization curves of CNT/NCNT@BIT-58 under Ar and N<sub>2</sub>. (c), (d) Potentialstatic curves of CNT/NCNT@BIT-58. (e), (f) UV-Vis absorption spectra of the electrolyte stained with indophenol blue indicator after electrolysis at selected potentials of CNT/NCNT@BIT-58. (g), (h) NH<sub>3</sub> yield rates and FEs corresponding of CNT/NCNT@BIT-58 at selected potentials.



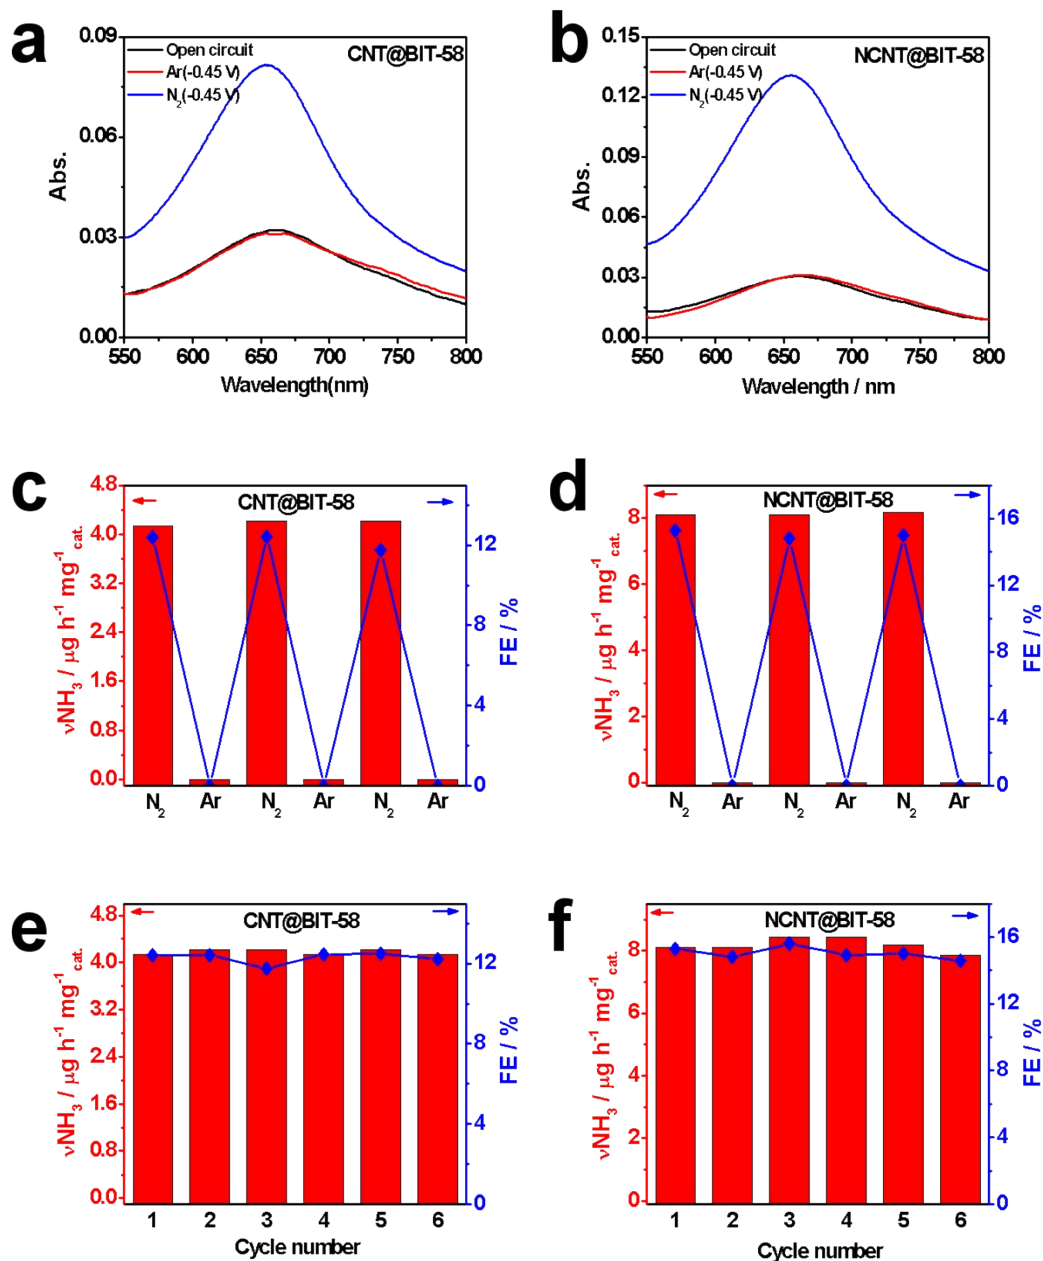

**Fig. S16.** (a), (b) UV-Vis absorption spectra of Ar-saturated post electrolytes under -0.45 V (red), N<sub>2</sub>-saturated post electrolytes under open circuit potential (black) and N<sub>2</sub>-saturated post electrolytes under -0.45 V (blue) of CNT/NCNT@BIT-58. (c), (d) NH<sub>3</sub> yield rates and corresponding FEs of CNT/NCNT@BIT-58 at -0.45 V with alternating 2 h cycles between N<sub>2</sub>-saturated and Ar-saturated electrolytes, for a total of 12 h. (e), (f) NH<sub>3</sub> yield rates and corresponding FEs of CNT/NCNT@BIT-58 after each cycle at -0.45 V vs. RHE.

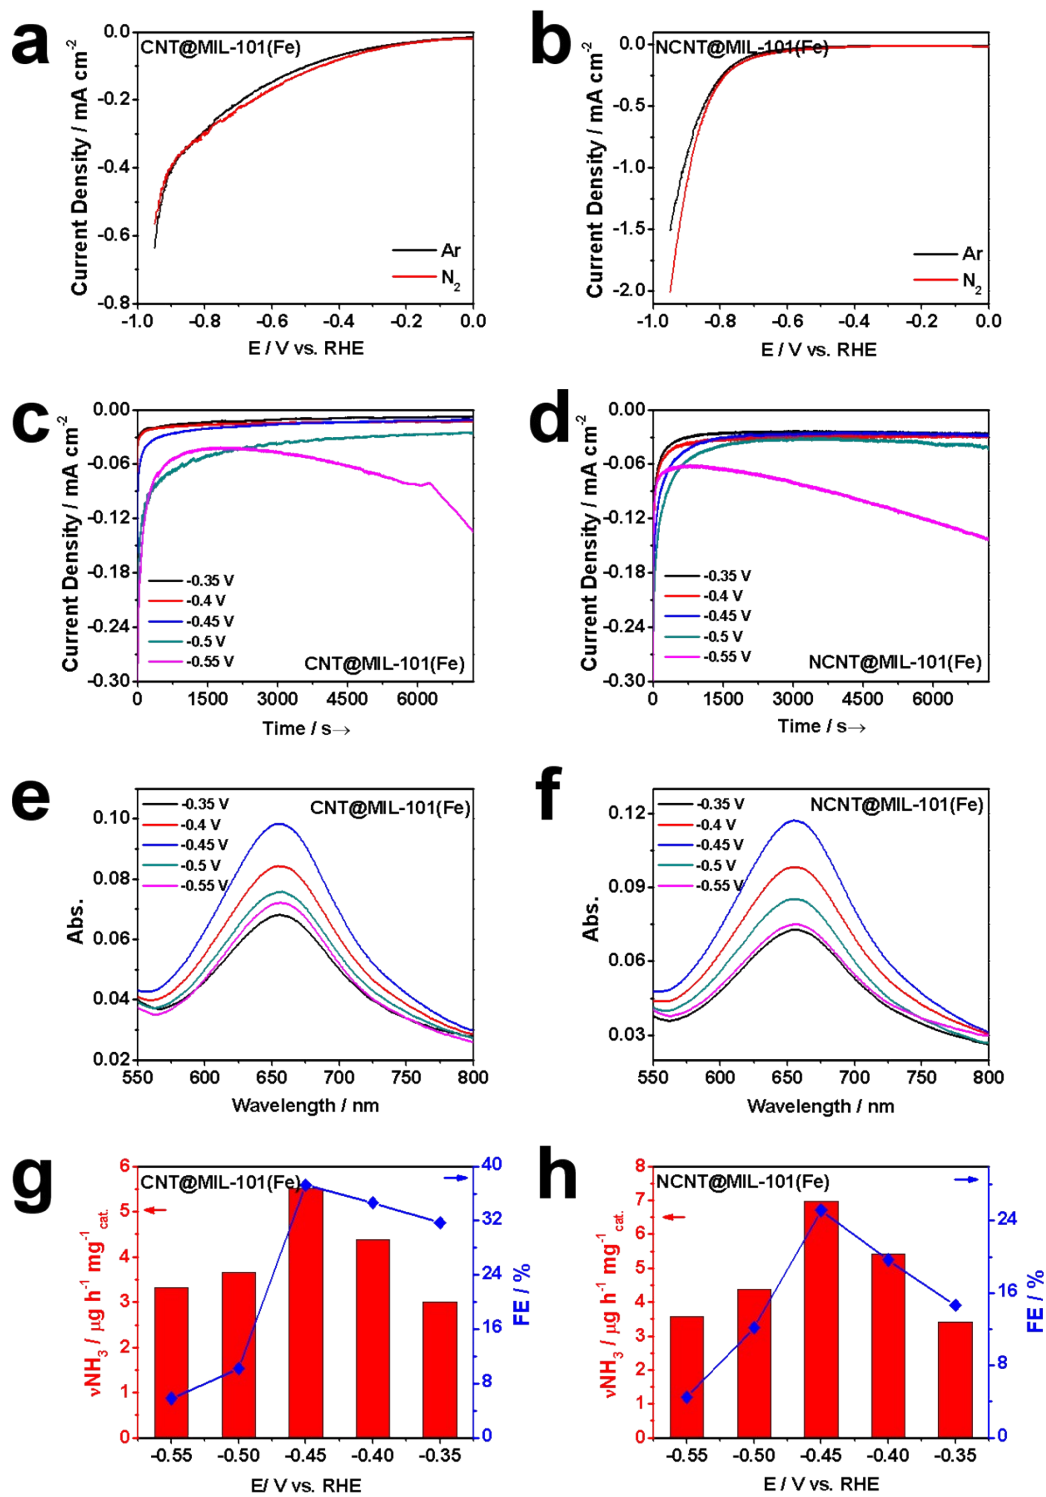

**Fig. S17.** (a), (b) Polarization curves of CNT/NCNT@MIL-101(Fe) under Ar and N<sub>2</sub>. (c), (d) Potentialstatic curves of CNT/NCNT@MIL-101(Fe). (e), (f) UV-Vis absorption spectra of the electrolyte stained with indophenol blue indicator after electrolysis at selected potentials of CNT/NCNT@MIL-101(Fe). (g), (h) NH<sub>3</sub> yield rates and corresponding FEs of CNT/NCNT@MIL-101(Fe) at selected.

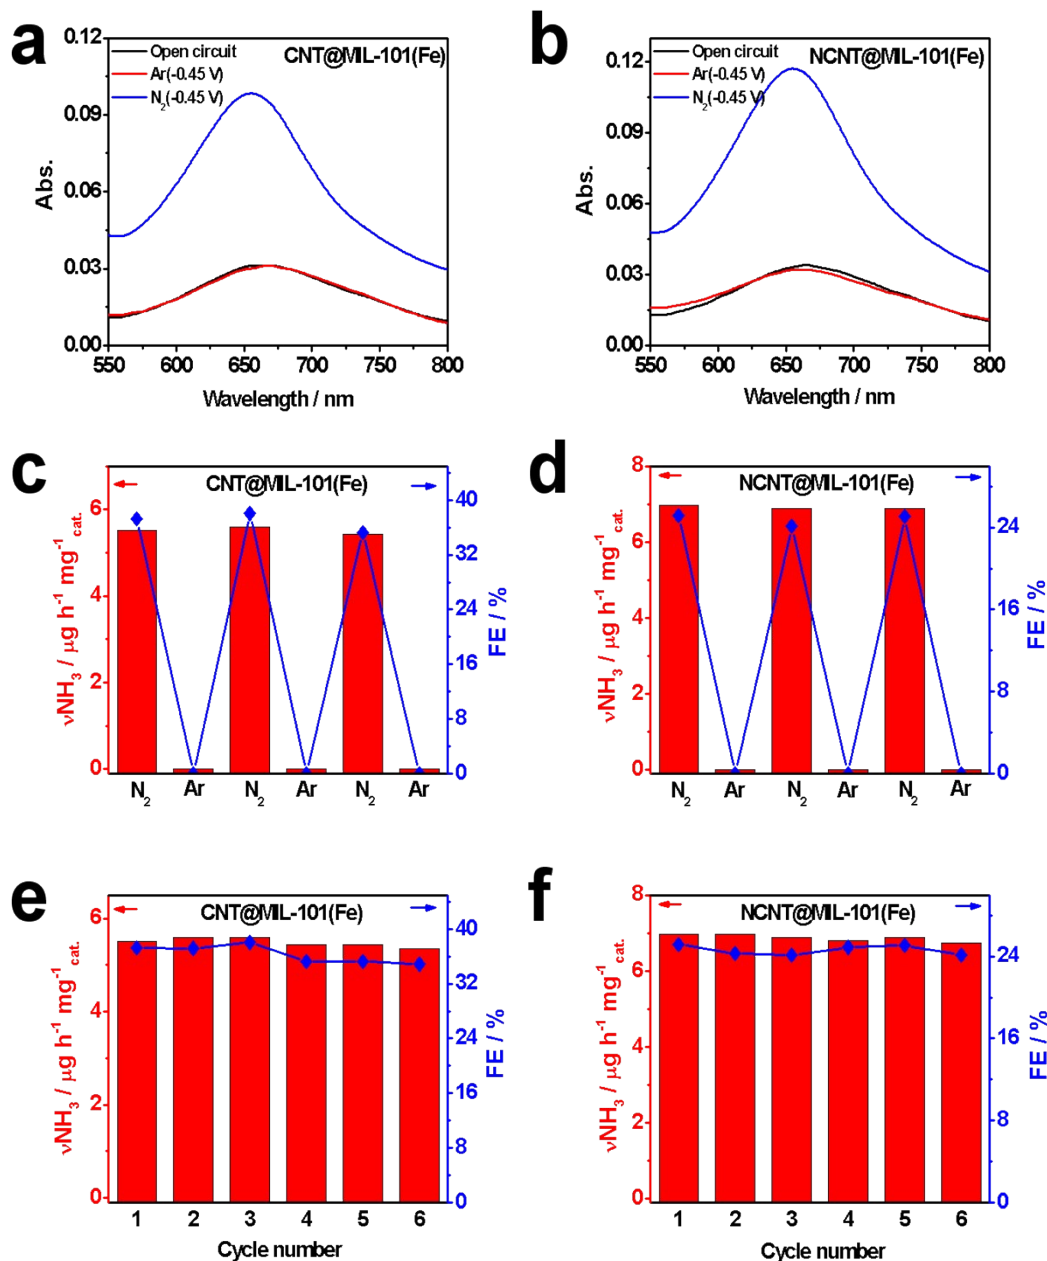

**Fig. S18.** (a), (b) UV-Vis absorption spectra of Ar-saturated post electrolytes under -0.45 V (red), N<sub>2</sub>-saturated post electrolytes under open circuit potential (black) and N<sub>2</sub>-saturated post electrolytes under -0.45 V (blue) of CNT/NCNT@MIL-101(Fe). (c), (d) NH<sub>3</sub> yield rates and corresponding FEs of CNT/NCNT@MIL-101(Fe) at -0.45 V with alternating 2 h cycles between N<sub>2</sub>-saturated and Ar-saturated electrolytes, for a total of 12 h. (e), (f) NH<sub>3</sub> yield rates and corresponding FEs of CNT/NCNT@MIL-101(Fe) after each cycle at -0.45 V vs. RHE.

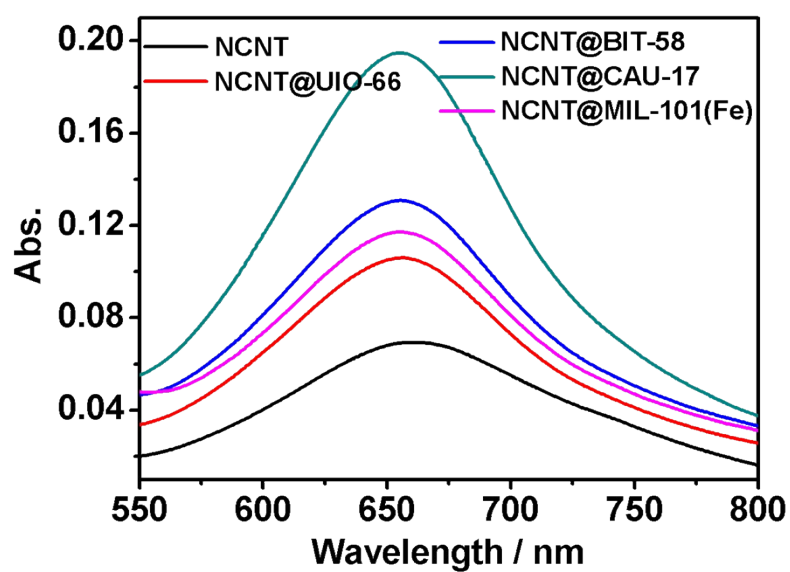

Fig. S19. The highest UV-Vis absorption spectra of each NCNT@MOF catalyst.

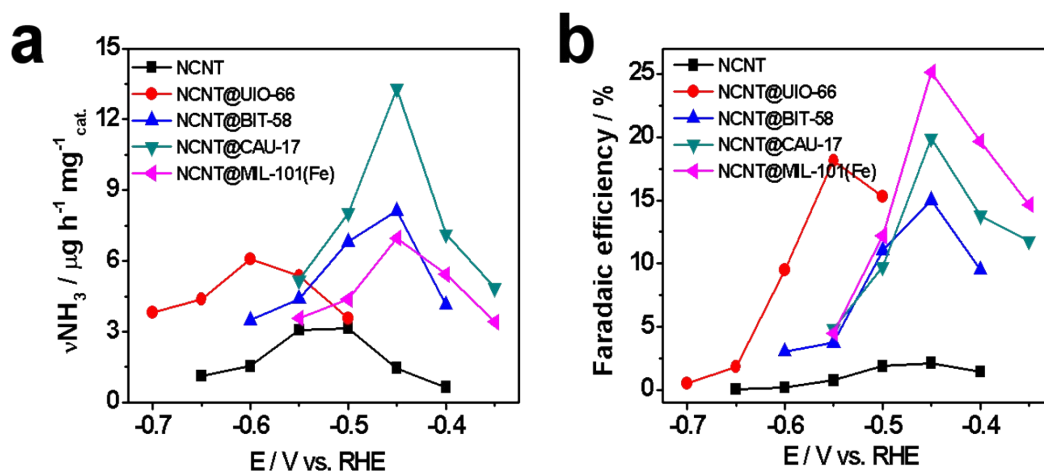

Fig. S20. (a)  $\text{NH}_3$  yield rates of NCNT@MOFs at selected potentials. (b) Corresponding FEs of NCNT@MOFs.

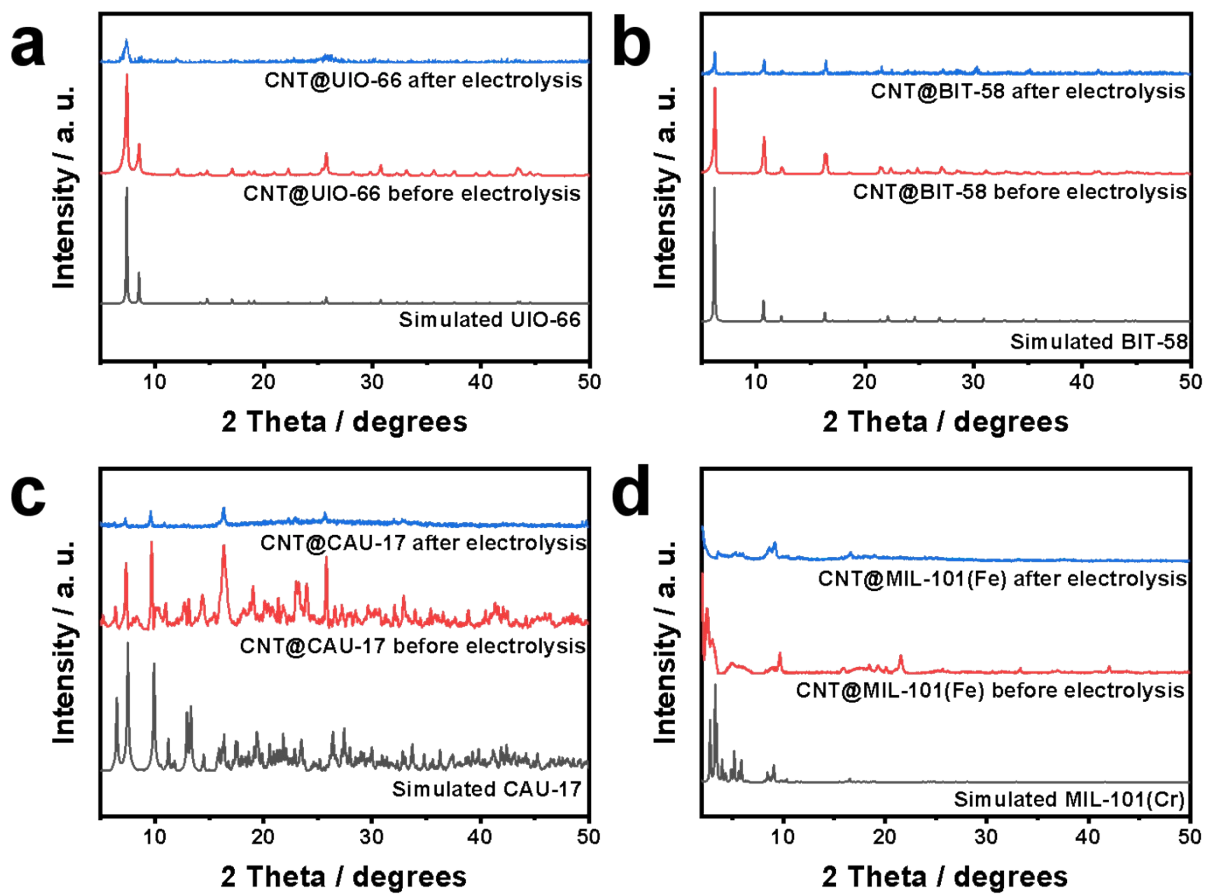

Fig. S21. XRD patterns of CNT@MOFs after electrolysis 6 cycles at carbon paper.

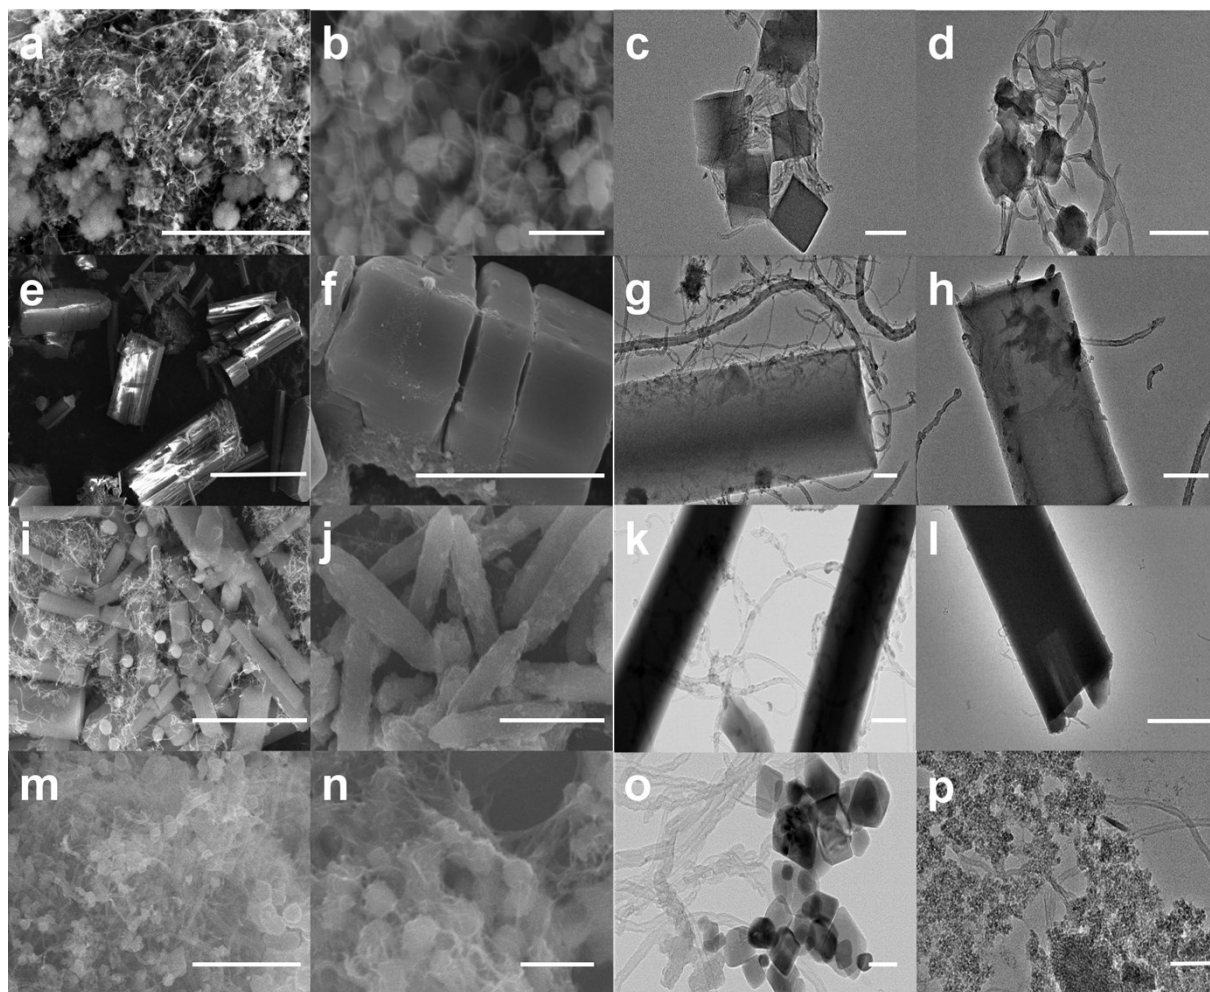

**Fig. S22.** SEM/TEM images of CNT@UIO-66 before (a)/(c) and after (b)/(d) electrolysis 6 cycles, CNT@BIT-58 before (e)/(g) and after (f)/(h) electrolysis 6 cycles, CNT@CAU-17 before (i)/(k) and after (j)/(l) electrolysis 6 cycles, CNT@MIL-101(Fe) before (m)/(o) and after (n)/(p) electrolysis 6 cycles. Scar bar are 3  $\mu\text{m}$  in (a), 500 nm in (b), (k), (l), (n), 100 nm in (c), (o), (p), 200 nm in (d), (g), (h), 20  $\mu\text{m}$  in (e), 5  $\mu\text{m}$  in (f), 200 nm in (g), (h), 4 $\mu\text{m}$  in (i), 2  $\mu\text{m}$  in (j), 1  $\mu\text{m}$  in (m).

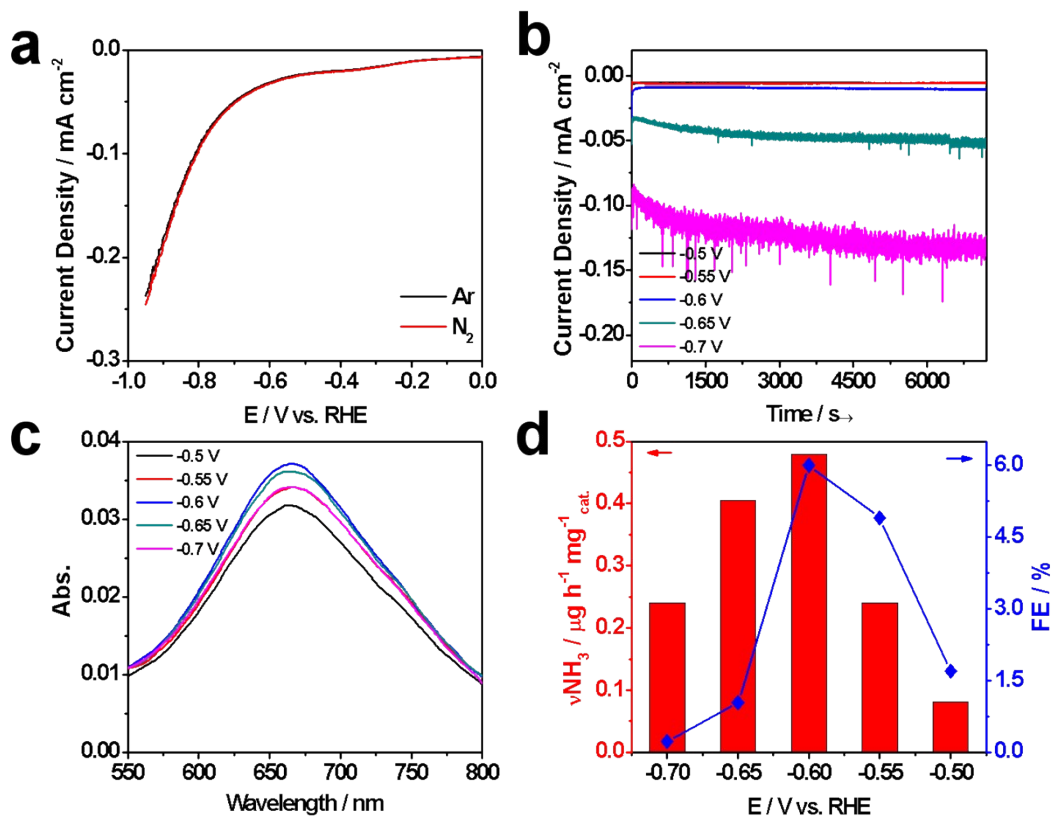

**Fig. S23.** (a) Polarization curves of pure UIO-66 under Ar and N<sub>2</sub>. (b) Potentialstatic curves of pure UIO-66. (c) UV-Vis absorption spectra of the electrolyte stained with indophenol blue indicator after electrolysis at selected potentials of pure UIO-66. (d) NH<sub>3</sub> yield rates and corresponding FEs of pure UIO-66.

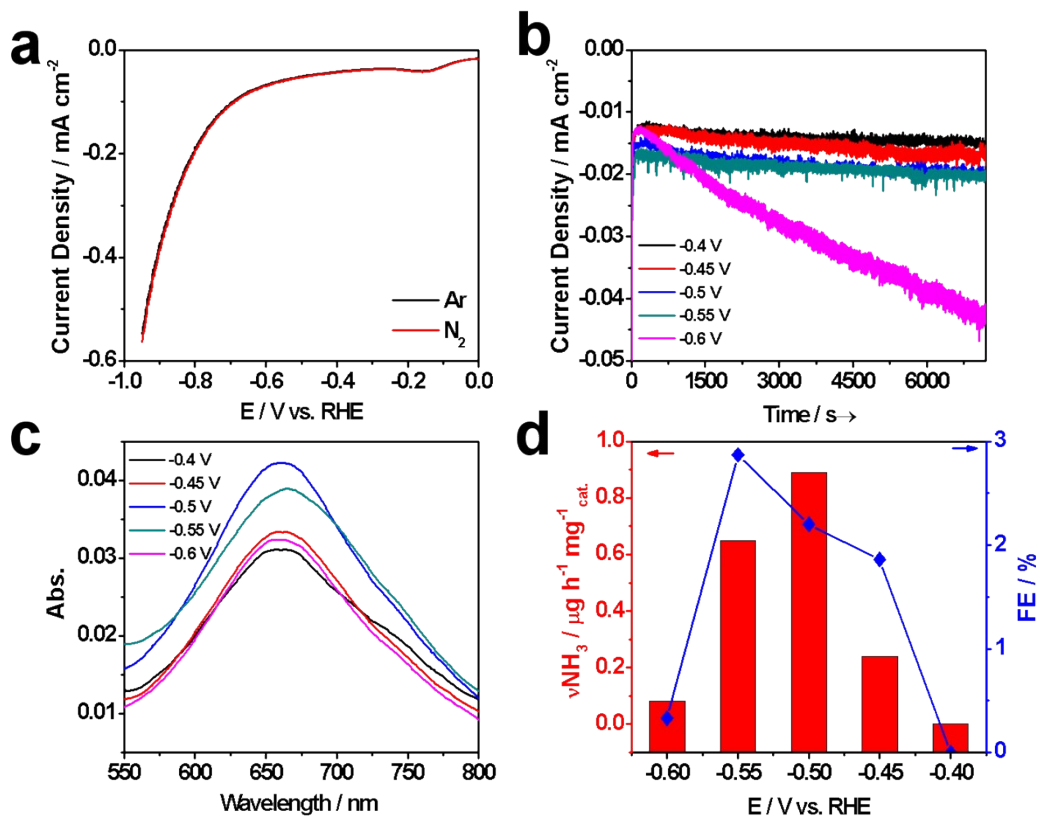

**Fig. S24.** (a) Polarization curves of pure BIT-58 under Ar and N<sub>2</sub>. (b) Potentialstatic curves of pure BIT-58. (c) UV-Vis absorption spectra of the electrolyte stained with indophenol blue indicator after electrolysis at selected potentials of pure BIT-58. (d) NH<sub>3</sub> yield rates and corresponding FEs of pure BIT-58.



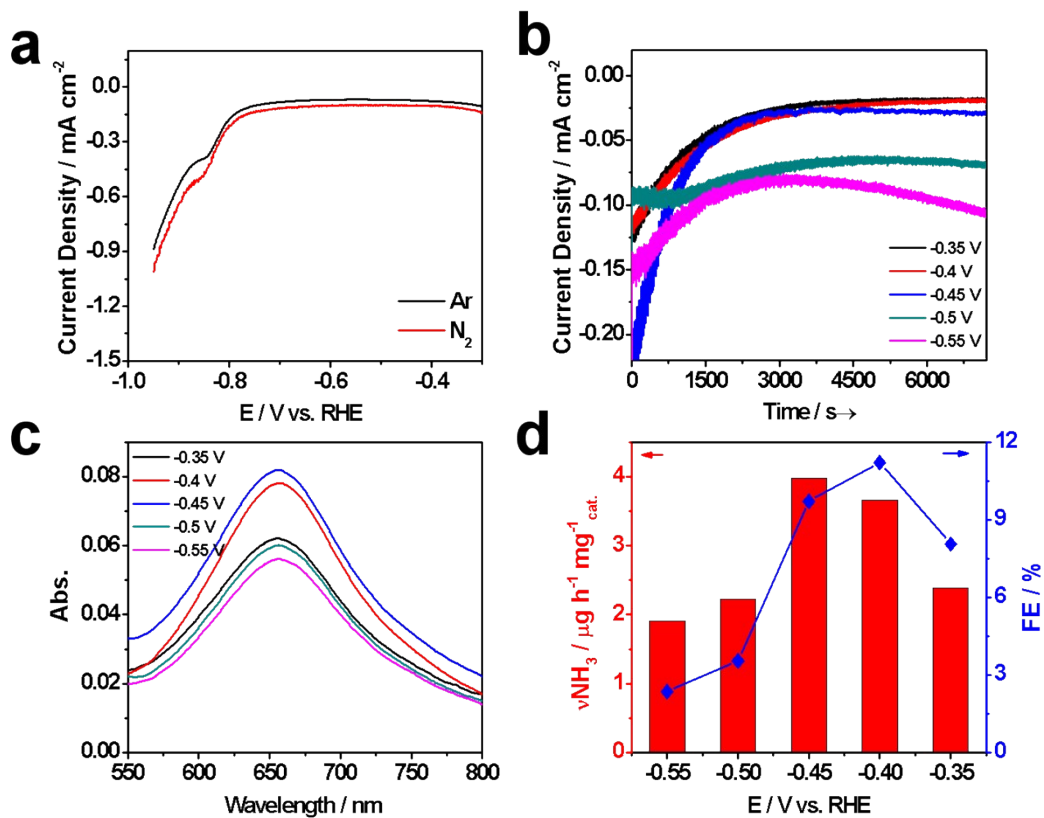

**Fig. S25.** (a) Polarization curves of pure CAU-17 under Ar and N<sub>2</sub>. (b) Potentialstatic curves of pure CAU-17. (c) UV-Vis absorption spectra of the electrolyte stained with indophenol blue indicator after electrolysis at selected potentials of pure CAU-17. (d) NH<sub>3</sub> yield rates and corresponding FEs of pure CAU-17.

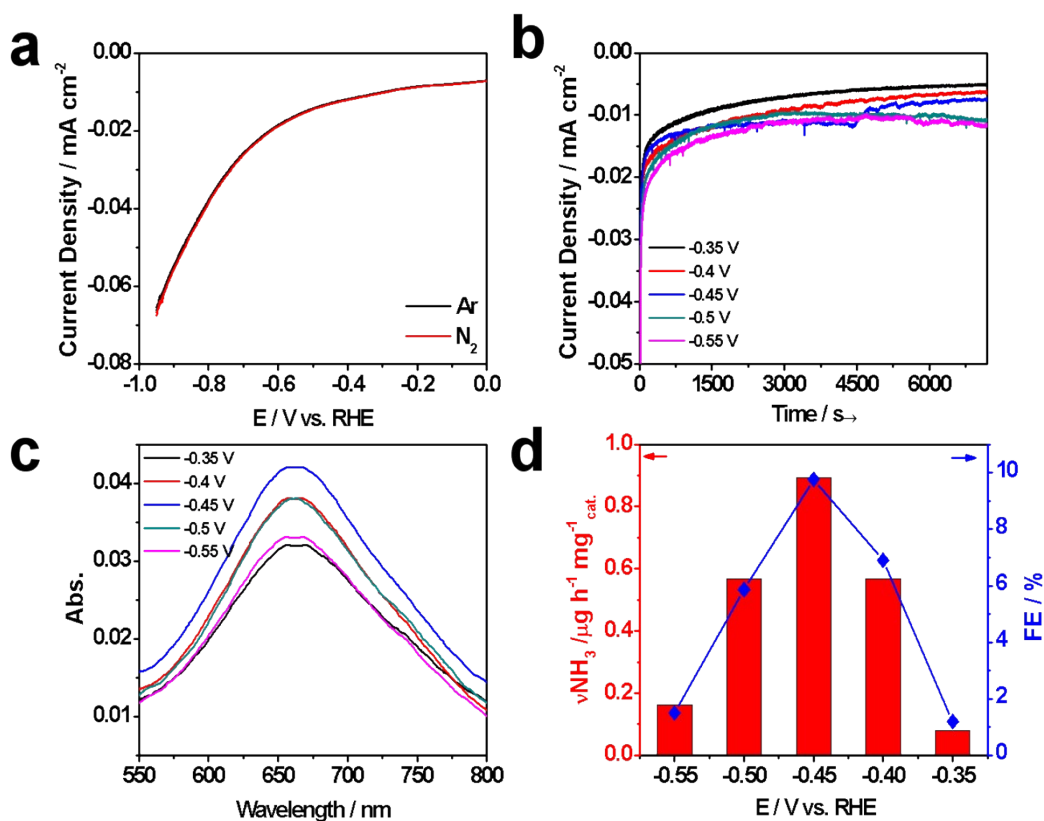

**Fig. S26.** (a) Polarization curves of pure MIL-101(Fe) under Ar and N<sub>2</sub>. (b) Potentialstatic curves of pure MIL-101(Fe). (c) UV-Vis absorption spectra of the electrolyte stained with indophenol blue indicator after electrolysis at selected potentials of pure MIL-101(Fe). (d) NH<sub>3</sub> yield rates and corresponding FEs of pure MIL-101(Fe).

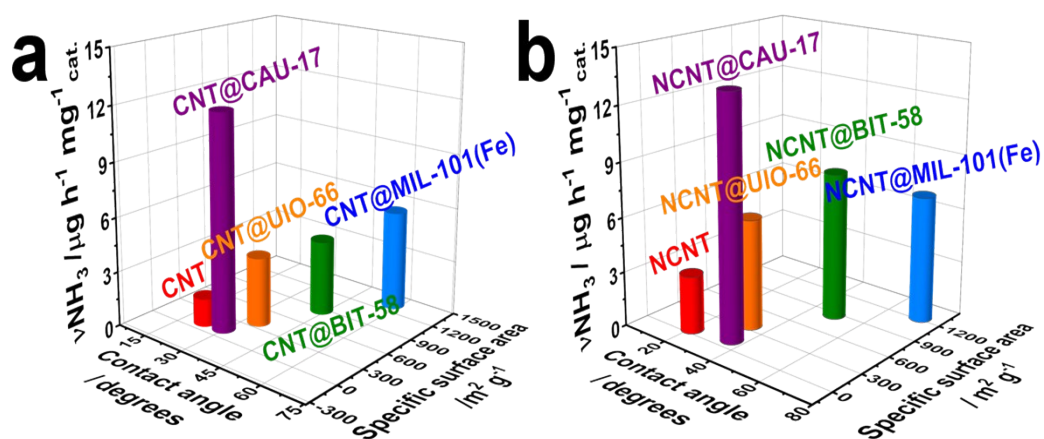

**Fig. S27.** (a), (b) The optimal NH<sub>3</sub> yield rates of CNT/NCNT@MOFs over different water contact angles and specific surface areas.

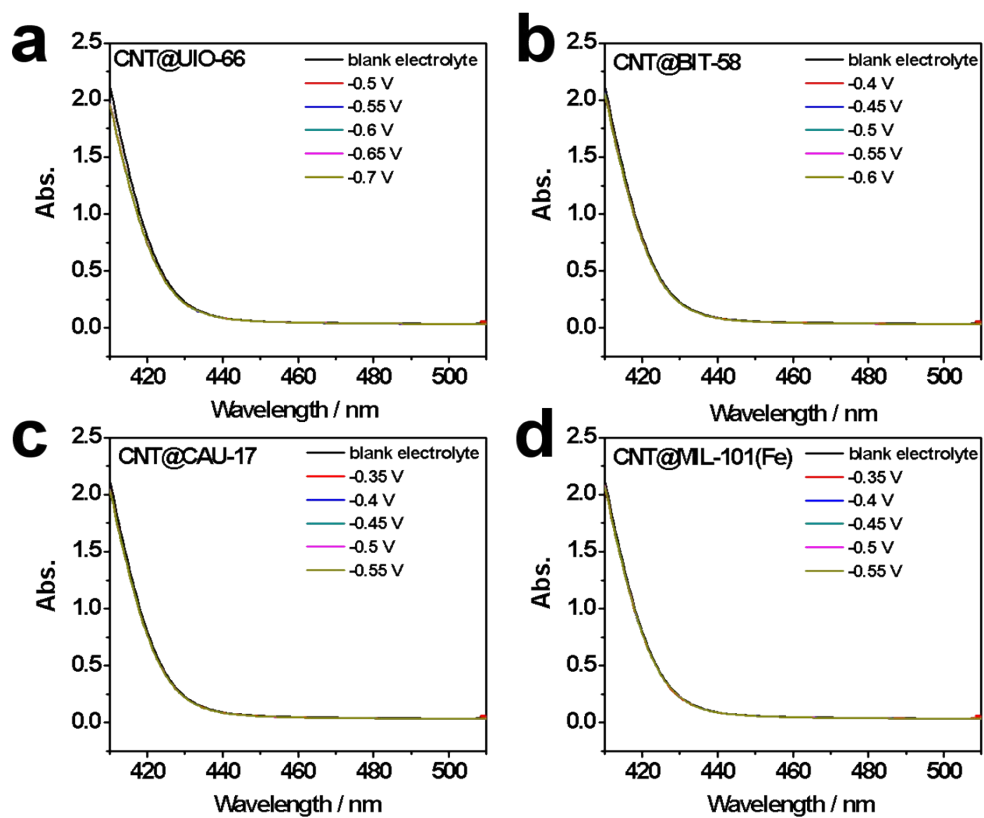

**Fig. S28.** UV-vis absorption spectra of the 0.05 M  $\text{H}_2\text{SO}_4$  electrolyte after electrolysis on (a) CNT@UIO-66, (b) CNT@BIT-58, (c) CNT@CAU-17 and (d) CNT@MIL-101(Fe) electrodes stained with  $\text{N}_2\text{H}_4$  color indicator after charging at selected potentials for 2 h under ambient conditions.

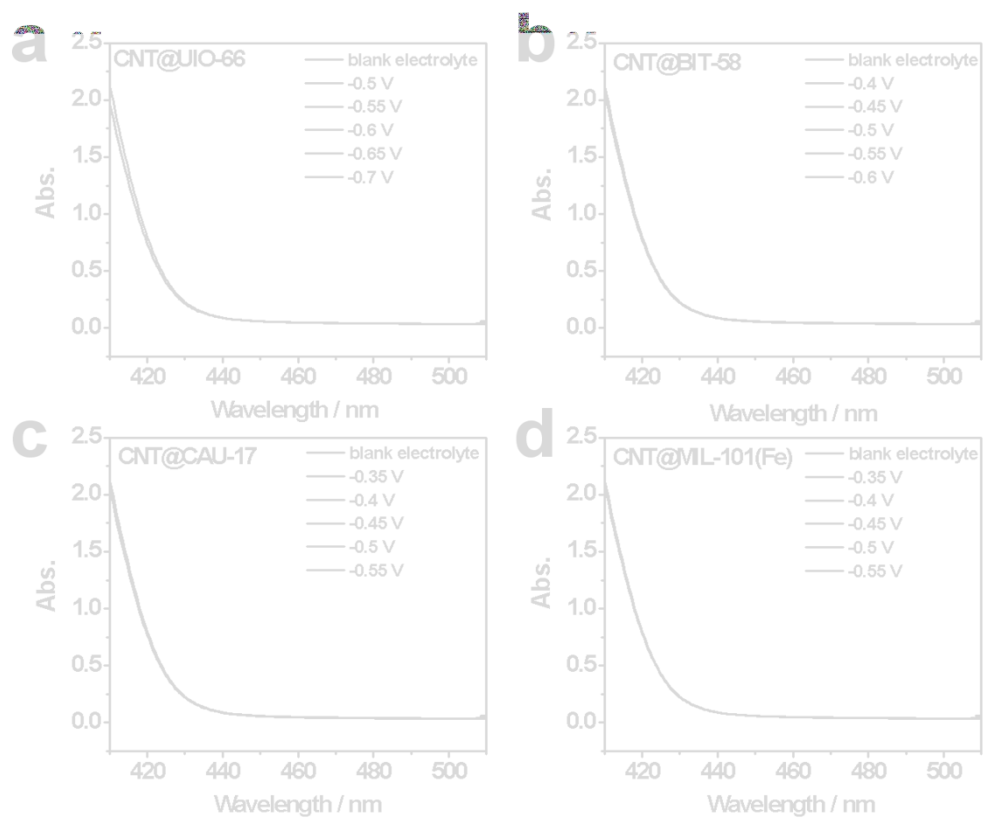

**Fig. S29.** UV-vis absorption spectra of the 0.05 M  $\text{H}_2\text{SO}_4$  electrolyte after electrolysis on (a) NCNT@UIO-66, (b) NCNT@BIT-58, (c) NCNT@CAU-17 and (d) NCNT@MIL-101(Fe) electrodes stained with  $\text{N}_2\text{H}_4$  color indicator after charging at selected potentials for 2 h under ambient conditions.

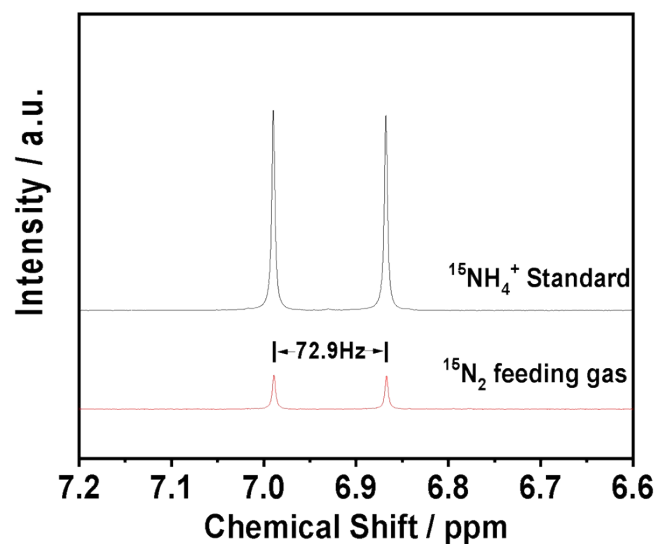

**Fig. S30.**  $^{15}\text{N}$  NMR spectra for the electrolyte of NCNT@CAU-17 after 2h electrolysis with  $^{15}\text{N}_2$  as the feeding gas, and the corresponding standard solution.

**Table S1.** Specific surface areas of CNT/NCNT and CNT/NCNT@MOFs.

| Catalyst        | Specific surface area / $\text{m}^2 \text{g}^{-1}$ | Catalyst         | Specific surface area / $\text{m}^2 \text{g}^{-1}$ |
|-----------------|----------------------------------------------------|------------------|----------------------------------------------------|
| CNT             | 127.6                                              | NCNT             | 56.5                                               |
| CNT@CAU-17      | 133.3                                              | NCNT@CAU-17      | 114.1                                              |
| CNT@UIO-66      | 395.8                                              | NCNT@UIO-66      | 361.1                                              |
| CNT@BIT-58      | 879.1                                              | NCNT@BIT-58      | 874.3                                              |
| CNT@MIL-101(Fe) | 1332.9                                             | NCNT@MIL-101(Fe) | 1233.2                                             |

**Table S2.** Comparison of the electrochemical NRR activities for CNT/NCNT@MOFs with other carbon-based catalysts under ambient conditions.

| Catalyst                            | Electrolyte                                                                      | Potential/V vs. RHE                             | NH <sub>3</sub> yield rate / $\mu\text{g h}^{-1} \text{mg}^{-1}_{\text{cat}}$                                                                | FE/%           | Reference        |
|-------------------------------------|----------------------------------------------------------------------------------|-------------------------------------------------|----------------------------------------------------------------------------------------------------------------------------------------------|----------------|------------------|
| CNT@UIO-66<br>NCNT@UIO-66           | 0.05 M H <sub>2</sub> SO <sub>4</sub>                                            | -0.55;<br>$\nu\text{NH}_3$ : -0.6<br>FE: -0.55  | 3.811 (2.64 x 10 <sup>-4</sup> $\mu\text{g cm}^{-2} \text{s}^{-1}$ )<br>6.081 (4.22 x 10 <sup>-4</sup> $\mu\text{g cm}^{-2} \text{s}^{-1}$ ) | 15.14<br>18.13 | <b>This work</b> |
| CNT@BIT-58<br>NCNT@BIT-58           | 0.05 M H <sub>2</sub> SO <sub>4</sub>                                            | -0.45                                           | 4.135 (2.87 x 10 <sup>-4</sup> $\mu\text{g cm}^{-2} \text{s}^{-1}$ )<br>8.108 (5.63 x 10 <sup>-4</sup> $\mu\text{g cm}^{-2} \text{s}^{-1}$ ) | 12.4<br>15.03  | <b>This work</b> |
| CNT@CAU-17<br>NCNT@CAU-17           | 0.05 M H <sub>2</sub> SO <sub>4</sub>                                            | $\nu\text{NH}_3$ : -0.45<br>FE: -0.55;<br>-0.45 | 11.92 (8.27 x 10 <sup>-4</sup> $\mu\text{g cm}^{-2} \text{s}^{-1}$ )<br>13.3 (9.24 x 10 <sup>-4</sup> $\mu\text{g cm}^{-2} \text{s}^{-1}$ )  | 31.27<br>19.9  | <b>This work</b> |
| CNT@MIL-101(Fe)<br>NCNT@MIL-101(Fe) | 0.05 M H <sub>2</sub> SO <sub>4</sub>                                            | -0.45                                           | 5.5135 (3.83 x 10 <sup>-4</sup> $\mu\text{g cm}^{-2} \text{s}^{-1}$ )<br>6.97 (4.84 x 10 <sup>-4</sup> $\mu\text{g cm}^{-2} \text{s}^{-1}$ ) | 37.28<br>25.15 | <b>This work</b> |
| B <sub>4</sub> C                    | 0.1 M HCl                                                                        | -0.75                                           | 7.38 x 10 <sup>-4</sup> $\mu\text{g cm}^{-2} \text{s}^{-1}$                                                                                  | 15.95          | 5                |
| B <sub>4</sub> C-BGQDs/CPE          | 0.1 M HCl                                                                        | $\nu\text{NH}_3$ : -0.45<br>FE: -0.35           | 28.6                                                                                                                                         | 16.7           | 8                |
| B-doped graphene                    | 0.05 M H <sub>2</sub> SO <sub>4</sub>                                            | -0.5                                            | 1.361 x 10 <sup>-3</sup> $\mu\text{g cm}^{-2} \text{s}^{-1}$                                                                                 | 10.8           | 9                |
| O-CNT/CP                            | 0.1 M LiClO <sub>4</sub>                                                         | -0.4                                            | 33.23                                                                                                                                        | 12.5           | 10               |
| TiC/C                               | 0.1 M HCl                                                                        | -0.5                                            | 14.1                                                                                                                                         | 5.8            | 11               |
| CC-450                              | 0.1 M Na <sub>2</sub> SO <sub>4</sub> +<br>0.02 M H <sub>2</sub> SO <sub>4</sub> | -0.3                                            | 4.403 x 10 <sup>-4</sup> $\mu\text{g cm}^{-2} \text{s}^{-1}$                                                                                 | 6.92           | 12               |
| NPC                                 | 0.1 M HCl                                                                        | -0.2                                            | 0.97                                                                                                                                         | 4.2            | 13               |
| PCN-NV4                             | 0.1 M HCl                                                                        | -0.2                                            | 8.09                                                                                                                                         | 11.59          | 14               |
| N-doped porous carbon-500           | 0.005 M H <sub>2</sub> SO <sub>4</sub>                                           | -0.1                                            | 6.19 x 10 <sup>-3</sup> $\mu\text{g cm}^{-2} \text{s}^{-1}$                                                                                  | 9.98           | 15               |
| S-doped carbon nanosphere           | 0.1 M Na <sub>2</sub> SO <sub>4</sub>                                            | -0.4                                            | 5.30 x 10 <sup>-4</sup> $\mu\text{g cm}^{-2} \text{s}^{-1}$                                                                                  | 7.47           | 16               |
| N-doped porous carbon-750           | 0.05 M H <sub>2</sub> SO <sub>4</sub>                                            | -0.9                                            | 3.97 x 10 <sup>-3</sup> $\mu\text{g cm}^{-2} \text{s}^{-1}$                                                                                  | 1.42           | 17               |

**Table S3.** Summary of characterization data and eNRR activities for CNTs@MOFs.

| Catalyst         | Specific surface area / m <sup>2</sup> g <sup>-1</sup> | Contact angle / degrees | NH <sub>3</sub> yield rate / μg h <sup>-1</sup> mg <sup>-1</sup> <sub>cat.</sub> | NH <sub>3</sub> yield rate / μg h <sup>-1</sup> mg <sup>-1</sup> <sub>CNT/NCNT</sub> | FE/%  |
|------------------|--------------------------------------------------------|-------------------------|----------------------------------------------------------------------------------|--------------------------------------------------------------------------------------|-------|
| CNT              | 127.6                                                  | 22.0±0.4                | 1.54                                                                             | 1.54                                                                                 | 1.77  |
| CNT@CAU-17       | 133.3                                                  | 29.3±0.3                | 11.92                                                                            | 61.24                                                                                | 31.27 |
| CNT@UIO-66       | 395.8                                                  | 34.1±0.8                | 3.811                                                                            | 115.0                                                                                | 15.14 |
| CNT@BIT-58       | 879.1                                                  | 43.3±2.5                | 4.135                                                                            | 184.69                                                                               | 12.4  |
| CNT@MIL-101(Fe)  | 1332.9                                                 | 57.7±4.6                | 5.5135                                                                           | 461.81                                                                               | 37.28 |
| NCNT             | 56.5                                                   | 20.5±2.1                | 3.16                                                                             | 3.16                                                                                 | 1.87  |
| NCNT@CAU-17      | 114.1                                                  | 35.4±2.2                | 13.3                                                                             | 71.88                                                                                | 19.9  |
| NCNT@UIO-66      | 361.1                                                  | 32.9±2.4                | 6.081                                                                            | 180.38                                                                               | 18.13 |
| NCNT@BIT-58      | 874.3                                                  | 48.6±3.5                | 8.108                                                                            | 373.08                                                                               | 15.04 |
| NCNT@MIL-101(Fe) | 1233.2                                                 | 71.7±2.8                | 6.97                                                                             | 607.35                                                                               | 25.15 |

## Reference

- 1 J. H. Cavka, S. Jakobsen, U. Olsbye, N. Guillou, C. Lamberti, S. Bordiga and K. P. Lillerud, *J. Am. Chem. Soc.*, 2008, **130**, 13850-13851.
- 2 I. A. Ken, K. Milan, J. Su, F. Mark, H. Y. Xu, X. D. Zou, O. Michael and S. Norbert, *J. Am. Chem. Soc.*, 2016, **138**, 1970-1976.
- 3 Y. F. Chen, S. H. Zhang, F. Chen, S. J. Cao, Y. Cai, S. Q. Li, H. W. Ma, X. J. Ma, P. F. Li, X. Q. Huang and B. Wang, *J. Mater. Chem. A*, 2018, **6**, 342-348.
- 4 J. Shin, M. Kim, J. Cirera, S. Chen, G. Y. Halder, T. A. Yersak, F. Paesani, S. M. Cohen and Y. S. Meng, *J. Mater. Chem. A*, 2015, **3**, 4738-4744.
- 5 W. B. Qiu, X. Y. Xie, J. D. Qiu, W. H. Fang, R. P. Liang, X. Ren, X. Q. Ji, G. W. Cui, A. M. Asiri, G. L. Cui, B. Tang and X. P. Sun, *Nat. Commun.*, 2018, **9**, 1-8.
- 6 D. Zhu, L. Zhang, R. E. Ruther and R. J. Hamers, *Nat. Mater.*, 2013, **12**, 836-841.
- 7 Y. C. Hao, Y. Guo, L. W. Chen, M. Shu, X. Y. Wang, T. A. Bu, W. Y. Gao, N. Zhang, X. Su, X. Feng, J. W. Zhou, B. Wang, C. W. Hu, A. X. Yin, R. Si, Y. W. Zhang and C. H. Yan, *Nat. Catal.*, 2019, **2**, 448-456.
- 8 W. B. Qiu, Y. X. Luo, R. P. Liang, J. D. Qiu and X. H. Xia, *Chem. Commun.*, 2019, **55**, 7406-7409.
- 9 X. M. Yu, P. Han, Z. X. Wei, L. S. Huang, Z. X. Gu, S. J. Peng, J. M. Ma and G. F. Zheng, *Joule*, 2018, **2**, 1-13.
- 10 J. X. Zhao, B. Wang, Q. Zhou, H. B. Wang, X. H. Li, H. Y. Chen, Q. Wei, D. Wu, Y. L. Luo, J. M. You, F. Gong and X. P. Sun, *Chem. Commun.*, 2019, **55**, 4997-5000.
- 11 G. S. Yu, H. R. Guo, W. H. Kong, T. Wang, Y. L. Luo, X. F. Shi, A. M. Asiri, T. S. Li and X. P. Sun, *J. Mater. Chem. A*, 2019, **7**, 19657-19661.
- 12 W. Y. Li, T. X. Wu, S. B. Zhang, Y. Y. Liu, C. J. Zhao, G. Q. Liu, G. Z. Wang, H. M. Zhang and H. J. Zhao, *Chem. Commun.*, 2018, **54**, 11188-11191.



- 13 P. F. Song, H. Wang, L. Kang, B. C. Ran, H. H. Song and R. M. Wang, *Chem. Commun.*, 2019, **55**, 687-690.
- 14 C. D. Lv, Y. M. Qian, C. S. Yan, Y. Ding, Y. Y. Liu, G. Chen and G. H. Yu, *Angew. Chem. Int. Ed.*, 2018, **57**, 10246-10250.
- 15 C. J. Zhao, S. B. Zhang, M. M. Han, X. Zhang, Y. Y. Liu, W. Y. Li, C. Chen, G. Z. Wang, H. M. Zhang and H. J. Zhao, *ACS Energy Lett.*, 2019, **4**, 377-383.
- 16 L. Xia, X. F. Wu, Y. Wang, Z. G. Niu, Q. Liu, T. S. Li, X. F. Shi, A. M. Asiri and X. P. Sun, *Small Methods*, 2019, **3**, 1800251.
- 17 Y. M. Liu, Y. Su, X. Quan, X. F. Fan, S. Chen, H. T. Yu, H. M. Zhao, Y. B. Zhang and J. J. Zhao, *ACS Catal.*, 2018, **8**, 1186-1191.
